# Supplementary material for: Potassium batteries for low temperature applications using high energy density organic cathodes
Source: Royal Society of Chemistry journal article supplement (doi:10.1039/d4ta05744a), 2024-11-19
Supplement: d4ta05744a1.pdf [file d4ta05744a1.pdf]

## Electronic Supplementary Information

### Potassium batteries for low temperature applications using high energy density organic cathodes

Elena V. Shchurik,<sup>a</sup> Alexander V. Mumyatov,<sup>a</sup> Ivan S. Zhidkov,<sup>b,c</sup> Tatiana A. Savinykh,<sup>a</sup> Guzaliya R. Baymuratova,<sup>a</sup> Alexander F. Shestakov,<sup>a,d</sup> Olga A. Kraevaya,<sup>a,\*</sup> and Pavel A. Troshin<sup>e, a,\*</sup>

*a. Federal Research Center for Problems of Chemical Physics and Medicinal Chemistry RAS, 1 Prospekt Akademika Semenova, 142432 Chernogolovka, Russia*

*b. Institute of Physics and Technology, Ural Federal University, 620002 Yekaterinburg, Russia*

*c. M. N. Mikheev Institute of Metal Physics of Ural Branch of Russian Academy of Sciences, 620108 Yekaterinburg, Russia*

*d. Faculty of Fundamental Physics & Chemical Engineering, Lomonosov Moscow State University, GSP 1, 1-51 Leninskie Gory, 119991 Moscow, Russia*

*e. Zhengzhou Research Institute of HIT, Longyuan East 7th 26, Jinshui District, 450003 Zhengzhou, China.*

\* Corresponding authors: okraevaya@inbox.ru, troshin2003@inbox.ru

## Table of contents

|                                                                                                                                                                                                                                                             |     |
|-------------------------------------------------------------------------------------------------------------------------------------------------------------------------------------------------------------------------------------------------------------|-----|
| Figure S1. Structures of the promising organic and hybrid cathode materials for PIBs. ....                                                                                                                                                                  | S3  |
| Figure S2. Examples of some types of defects expectedly formed in P1 and P2.....                                                                                                                                                                            | S4  |
| Figure S3. Experimental FTIR spectrum of P1 and calculated spectra for the model structures P1-A, P1-B, and P1-C.....                                                                                                                                       | S4  |
| Figure S4. Relative energies of various P2-derived defect structures.....                                                                                                                                                                                   | S5  |
| Figure S5. Experimental FTIR spectrum of P2 and calculated spectra for the model structures P2-A and P2-B.....                                                                                                                                              | S5  |
| Figure S6. Realistic structures of P1 and P2 materials.....                                                                                                                                                                                                 | S6  |
| Table S1. Chemical analysis data for P1 and P2.....                                                                                                                                                                                                         | S6  |
| Figure S7. TGA profiles of polymers P1 (a) and P2 (b). ....                                                                                                                                                                                                 | S6  |
| Table S2. Surface properties of P1-P2 .....                                                                                                                                                                                                                 | S7  |
| Figure S8. Cyclic voltammograms at different scan rates for potassium half-cells based on P1 (a) P2 (c); the dependence of $\log(i)$ (current) vs. $\lg(v)$ (sweep rate) used for parameter $b$ estimation rates for half-cells based on P1 (b) P2 (d)..... | S7  |
| Figure S9. Charge/discharge profiles of the batteries based on P1 or P2 and cycled at $200 \text{ mA g}^{-1}$ ( $50^{\text{th}}$ cycles). ....                                                                                                              | S8  |
| Figure S10. Long-term charge-discharge cycling of the cells with the P1 cathode at $10 \text{ A g}^{-1}$ . ....                                                                                                                                             | S8  |
| Figure S11. Survey XPS spectra of the non-charged and discharged electrodes based on P1 and P2.....                                                                                                                                                         | S9  |
| Figure S12. High-resolution core-level XPS C1s and K2p spectra of the non-charged and discharged electrodes based on P1 and P2. ....                                                                                                                        | S9  |
| Figure S13. High-resolution XPS O1s spectra of the non-charged and discharged electrodes based on P1 and P2.....                                                                                                                                            | S10 |
| Figure S14. High-resolution XPS N1s spectra of the non-charged and discharged electrodes based on P1 and P2.....                                                                                                                                            | S10 |
| Figure S15. The metalation energies calculated for the stepwise introduction of potassium atoms into the repeating units of polymers P1 and P2.....                                                                                                         | S11 |
| Figure S16. Charge/discharge profiles for the batteries based on P1 (a) and P2 (b) at different temperatures and current densities.....                                                                                                                     | S11 |
| Details of metalation energy calculation .....                                                                                                                                                                                                              | S12 |
| Figure S17. Geometry of the initial stack of two dimers of P1 (a) and its metalated forms $\text{P1K}_n$ (top view and side view): for $n=2$ per unit (b), $n=3$ (c), $n=4$ (d), $n=6$ (e). Bond lengths are given in $\text{\AA}$ .....                    | S13 |
| Figure S18. Geometry of the initial stack of two hexamers of P2 (a) and its metalated forms $\text{P2K}_n$ (top view and side view): for $n=3$ per unit (b), $n=4$ (c), $n=5$ (d). Bond lengths are given in $\text{\AA}$ .....                             | S13 |
| Cartesian coordinates for the calculated structures .....                                                                                                                                                                                                   | S14 |
| Coordinates of the metalated stack of two P1 dimers ( $n=6 \text{ K}^+$ per unit).....                                                                                                                                                                      | S14 |
| Coordinates of the metalated stack of two P2 hexamers ( $n=5 \text{ K}^+$ per unit) .....                                                                                                                                                                   | S20 |

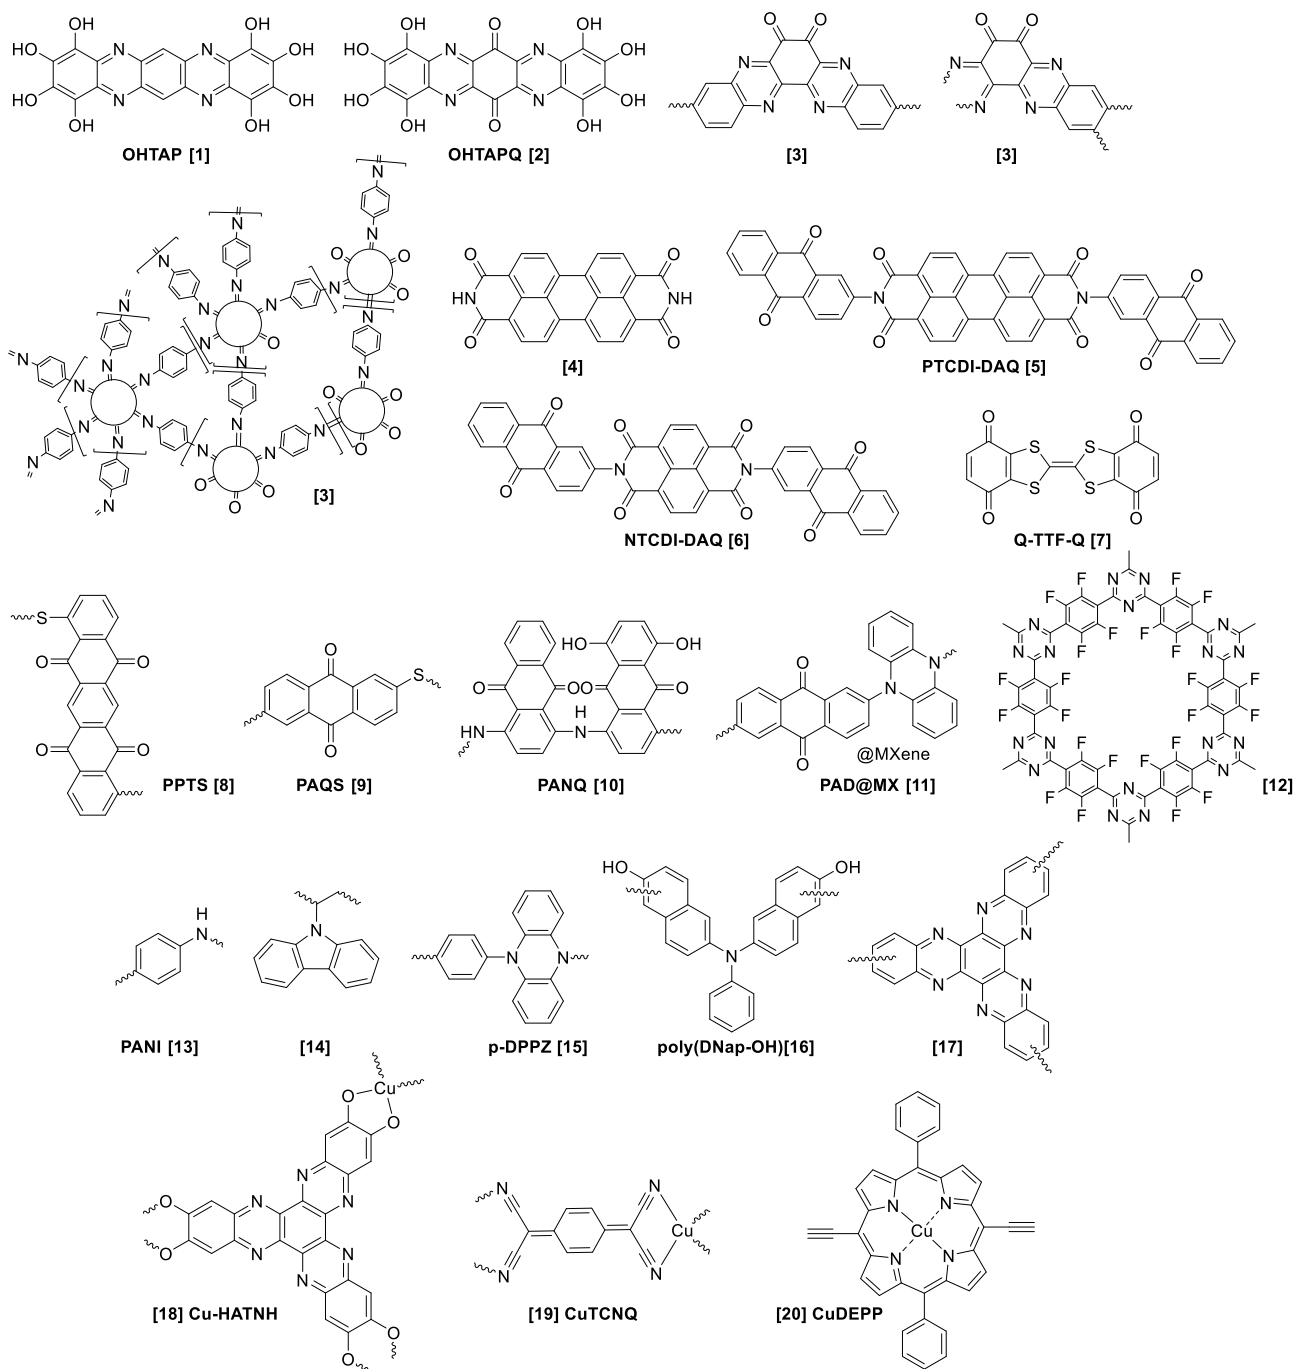

Figure S1. Structures of the promising organic and hybrid cathode materials for PIBs.

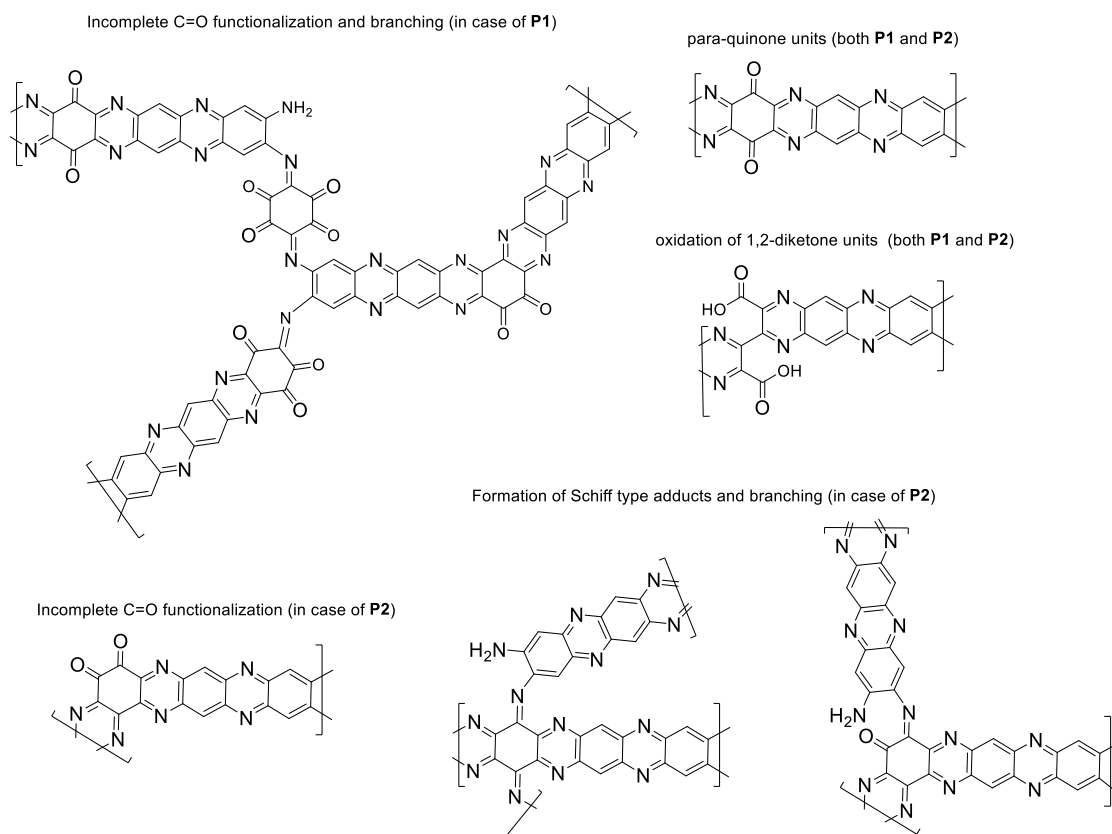

Figure S2. Examples of some types of defects expectedly formed in **P1** and **P2**.

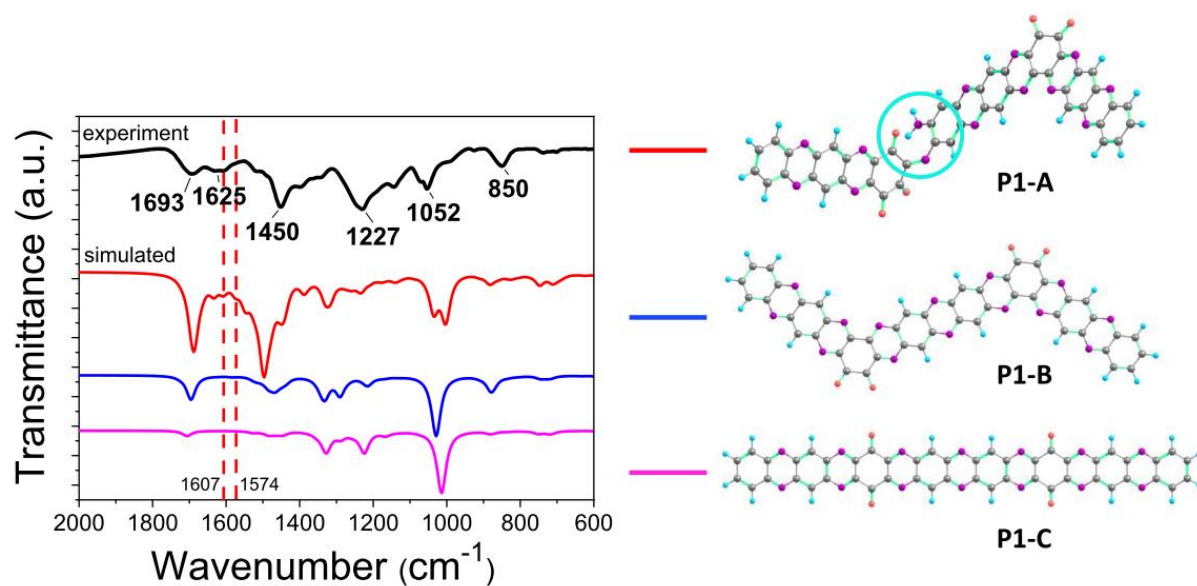

Figure S3. Experimental FTIR spectrum of **P1** and calculated spectra for the model structures **P1-A**, **P1-B**, and **P1-C**.

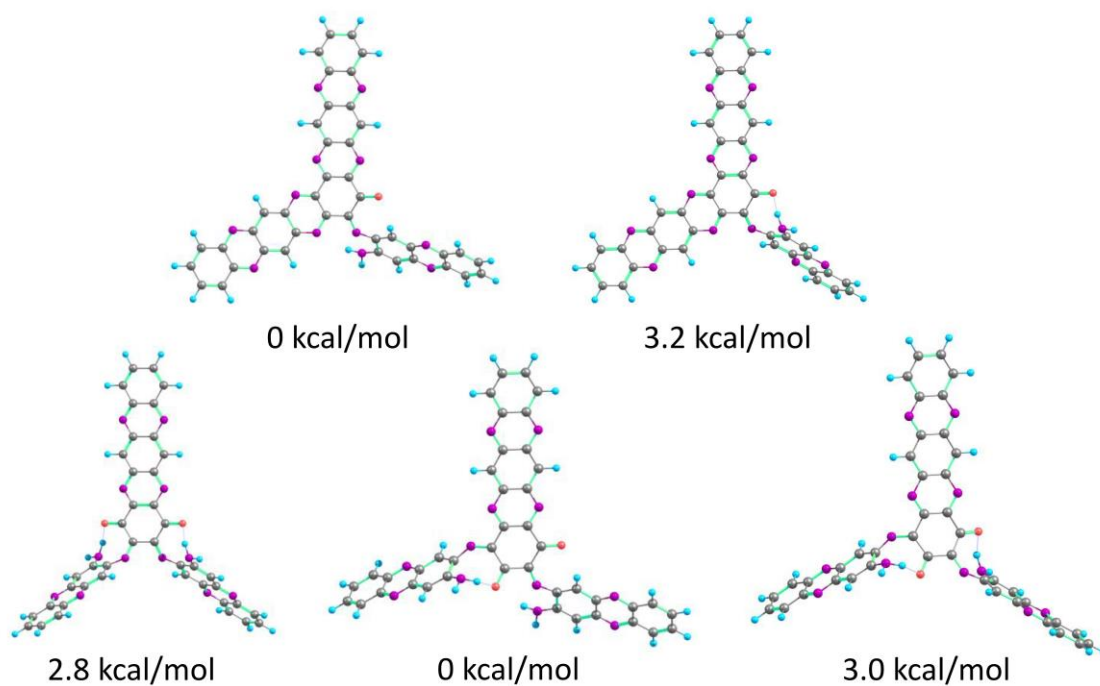

Figure S4. Relative energies of various **P2**-derived defect structures.

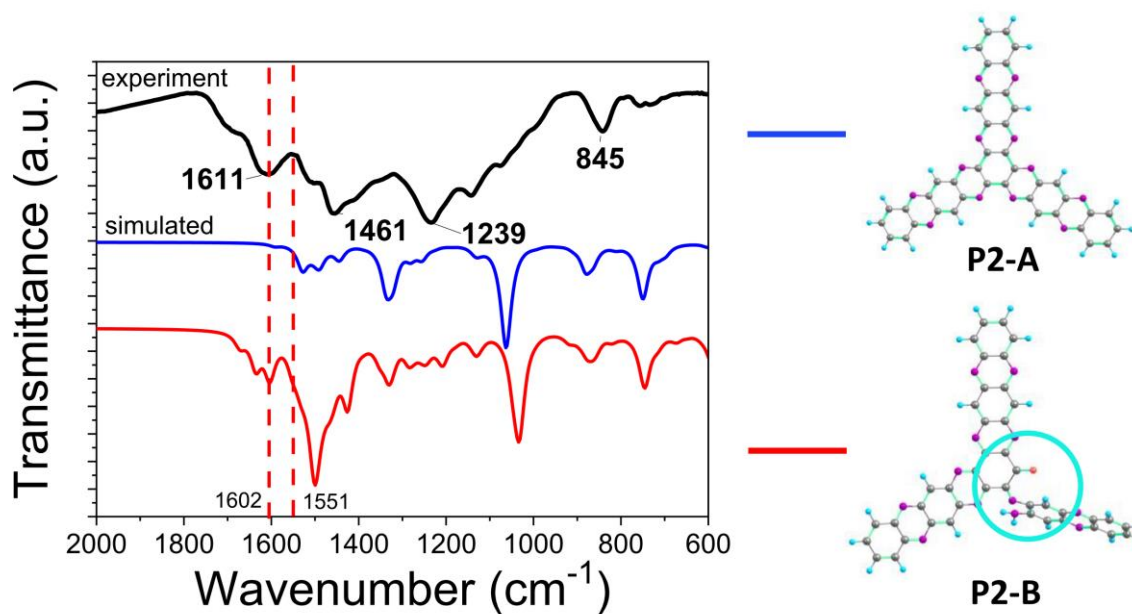

Figure S5. Experimental FTIR spectrum of **P2** and calculated spectra for the model structures **P2-A** and **P2-B**.

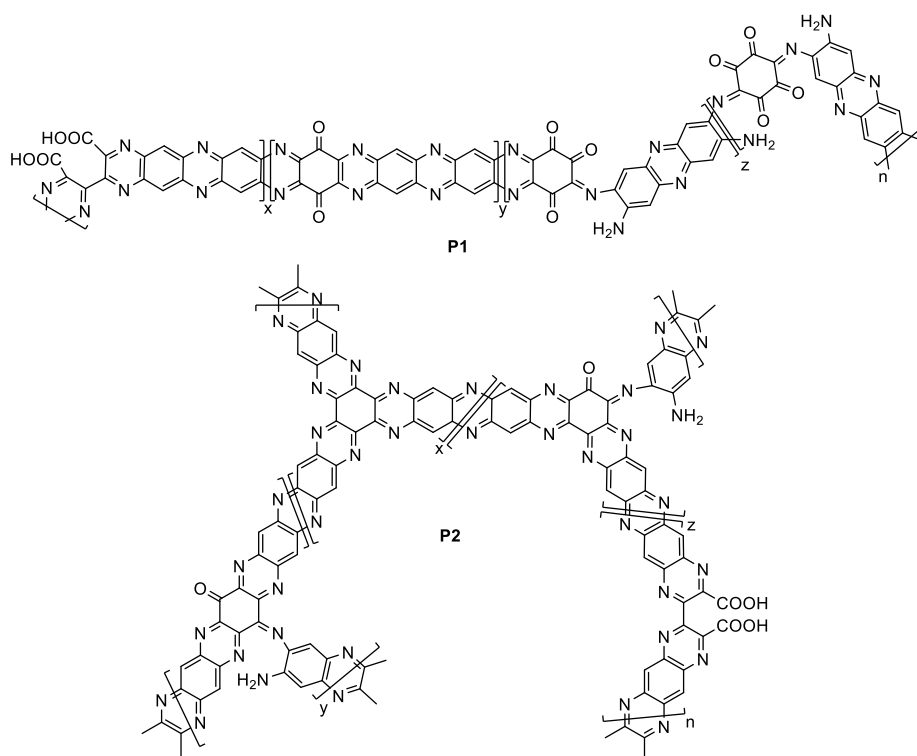

Figure S6. Realistic structures of **P1** and **P2** materials.

Table S1. Chemical analysis data for **P1** and **P2**

| Material                                          | C, %  | H, % | N, %  | O, % = 100% - (C,%+H,%+N, %) |
|---------------------------------------------------|-------|------|-------|------------------------------|
| <b>P1</b> (experimental)                          | 47.14 | 3.54 | 20.21 | 29.11                        |
| <b>P1</b> (calculated for [P1]*6H <sub>2</sub> O) | 48.65 | 3.63 | 18.91 | 28.80                        |
| <b>P2</b> (experimental)                          | 45.49 | 3.71 | 20.19 | 30.61                        |
| <b>P2</b> (calculated for [P2]*8H <sub>2</sub> O) | 51.07 | 3.93 | 22.33 | 22.67                        |

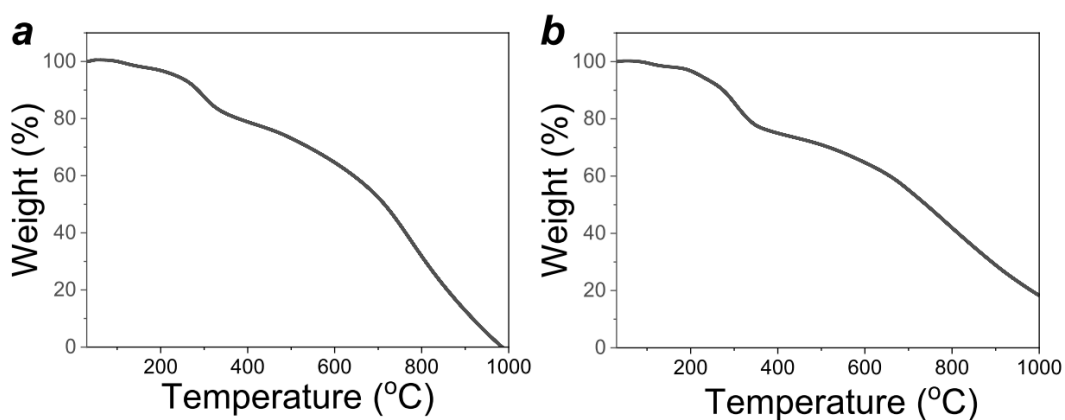

Figure S7. TGA profiles of polymers **P1** (a) and **P2** (b).

Table S2. Surface properties of **P1-P2**

| Compound  | $S_{\text{BET}}$<br>( $\text{m}^2/\text{g}$ ) | V pore<br>$P/P_0=0.99$<br>( $\text{cm}^3/\text{g}$ ) | V<br>( $\text{cm}^3/\text{g}$ ) | d<br>(nm) |
|-----------|-----------------------------------------------|------------------------------------------------------|---------------------------------|-----------|
| <b>P1</b> | 75.6                                          | 0.26                                                 | 0.26                            | 3.42      |
| <b>P2</b> | 25.5                                          | 0.15                                                 | 0.14                            | 3.42      |

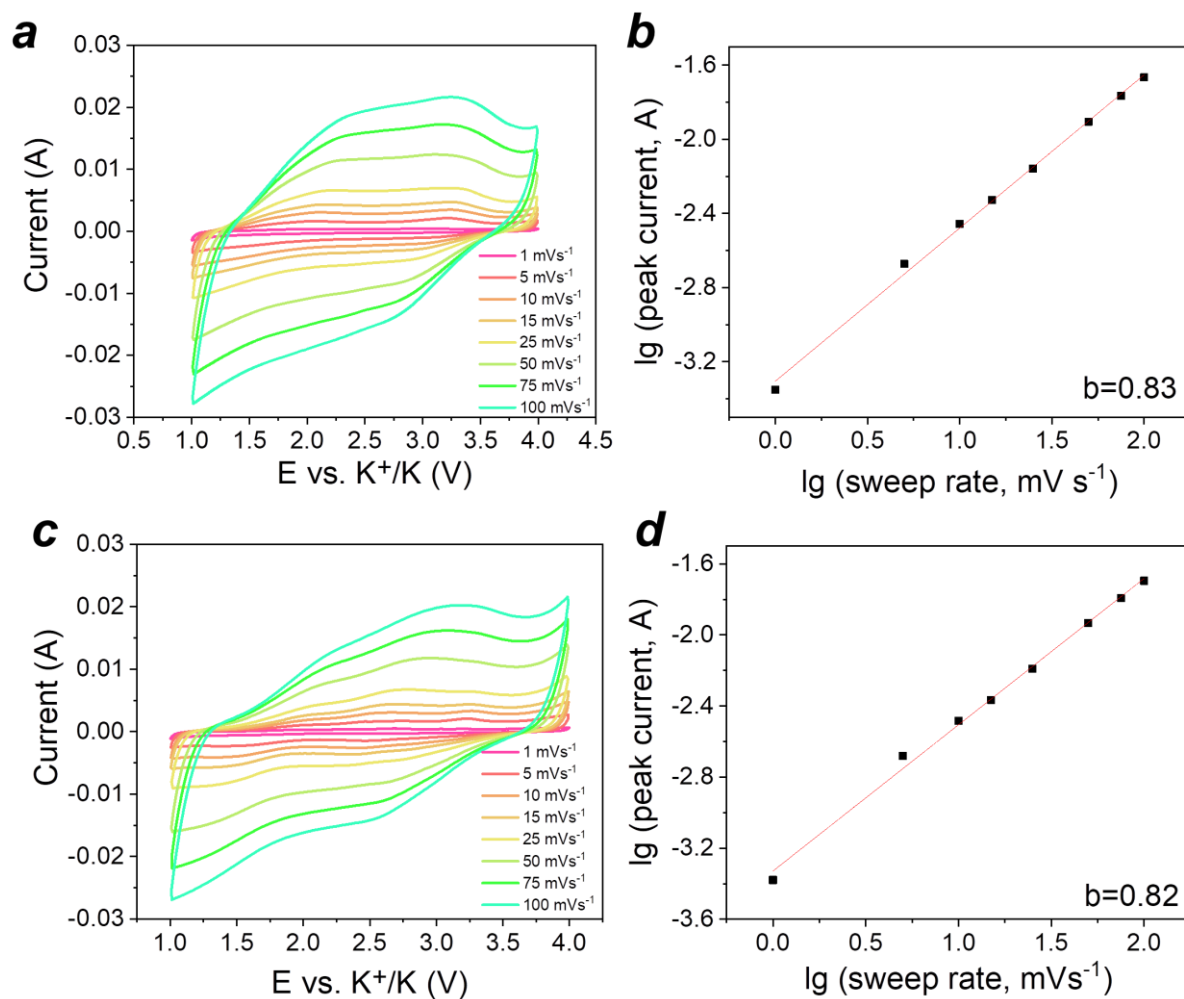

Figure S8. Cyclic voltammograms at different scan rates for potassium half-cells based on **P1** (a) **P2** (c); the dependence of  $\lg(i)$  (current) vs.  $\lg(v)$  (sweep rate) used for parameter  $b$  estimation rates for half-cells based on **P1** (b) **P2** (d).

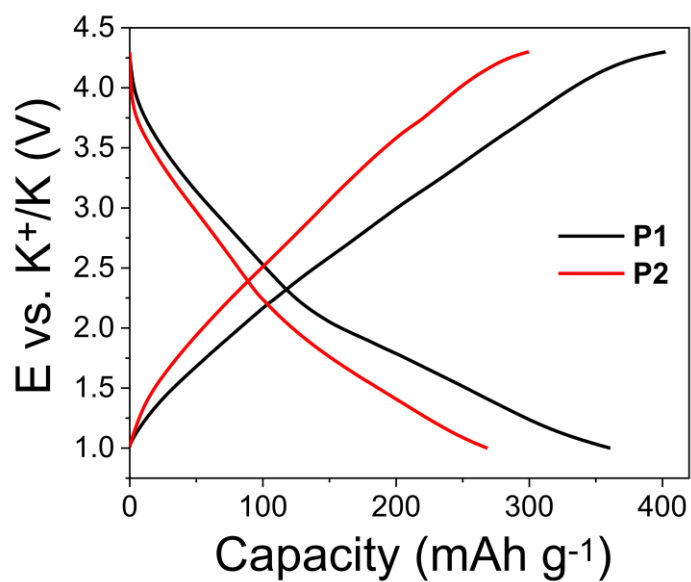

Figure S9. Charge/discharge profiles of the batteries based on **P1** or **P2** and cycled at  $200 \text{ mA g}^{-1}$  ( $50^{\text{th}}$  cycles).

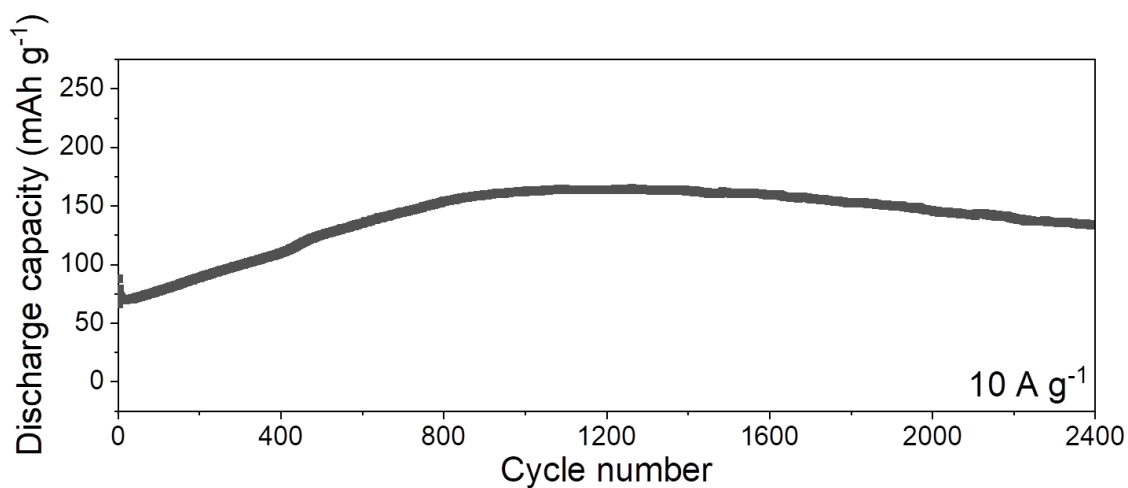

Figure S10. Long-term charge-discharge cycling of the cells with the **P1** cathode at  $10 \text{ A g}^{-1}$ .



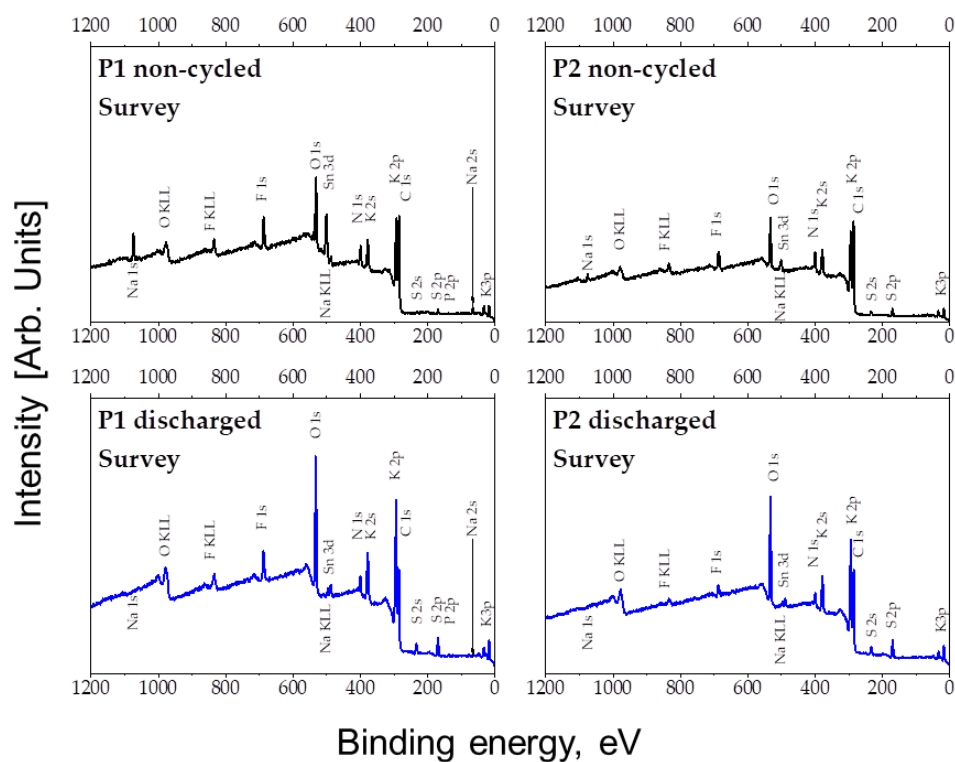

Figure S11. Survey XPS spectra of the non-charged and discharged electrodes based on **P1** and **P2**.

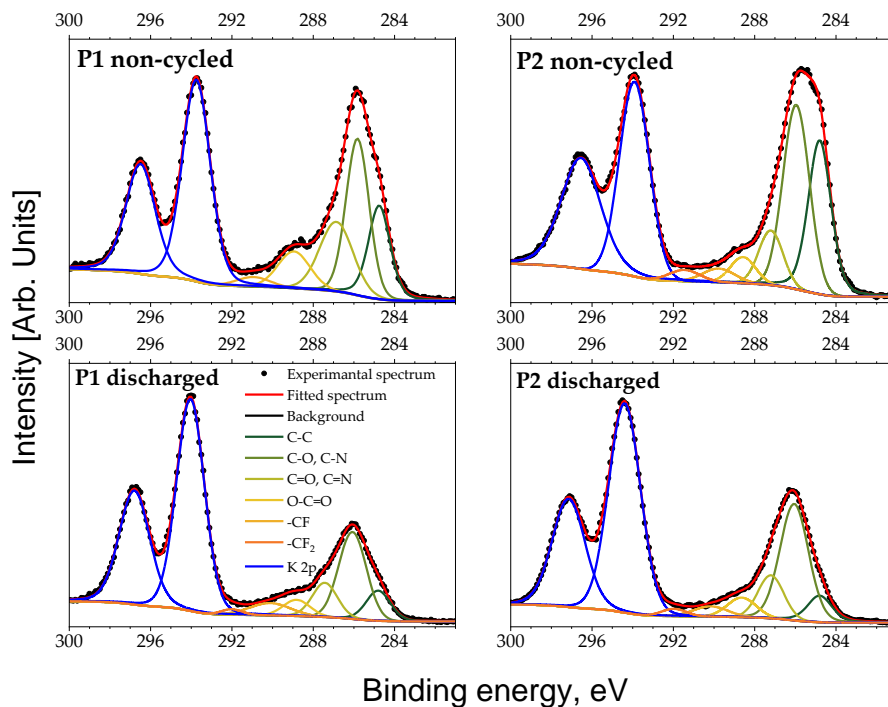

Figure S12. High-resolution core-level XPS C1s and K2p spectra of the non-charged and discharged electrodes based on **P1** and **P2**.

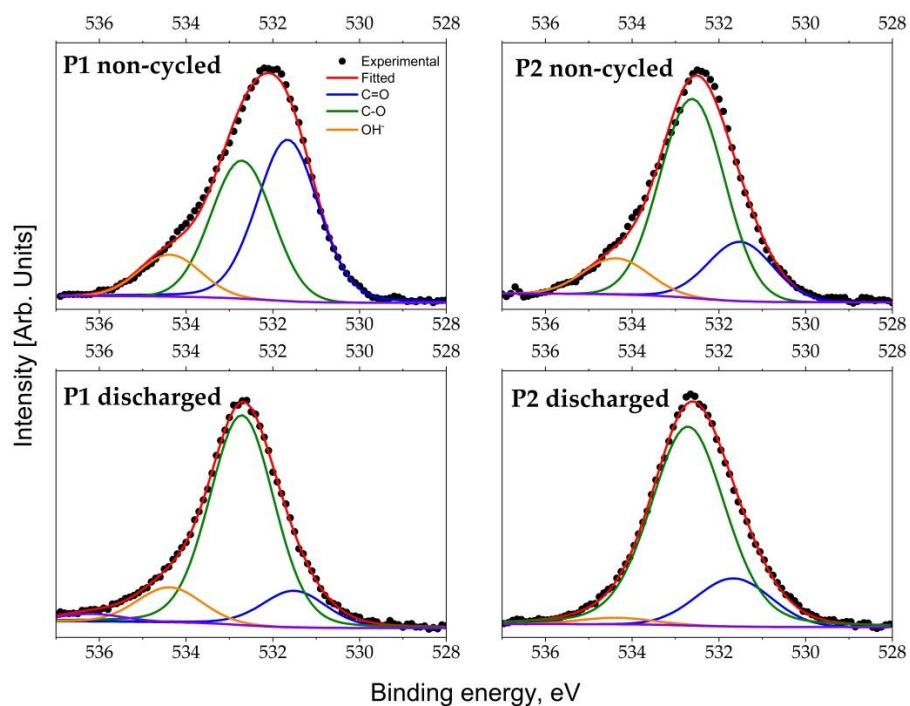

Figure S13. High-resolution XPS O1s spectra of the non-charged and discharged electrodes based on **P1** and **P2**.

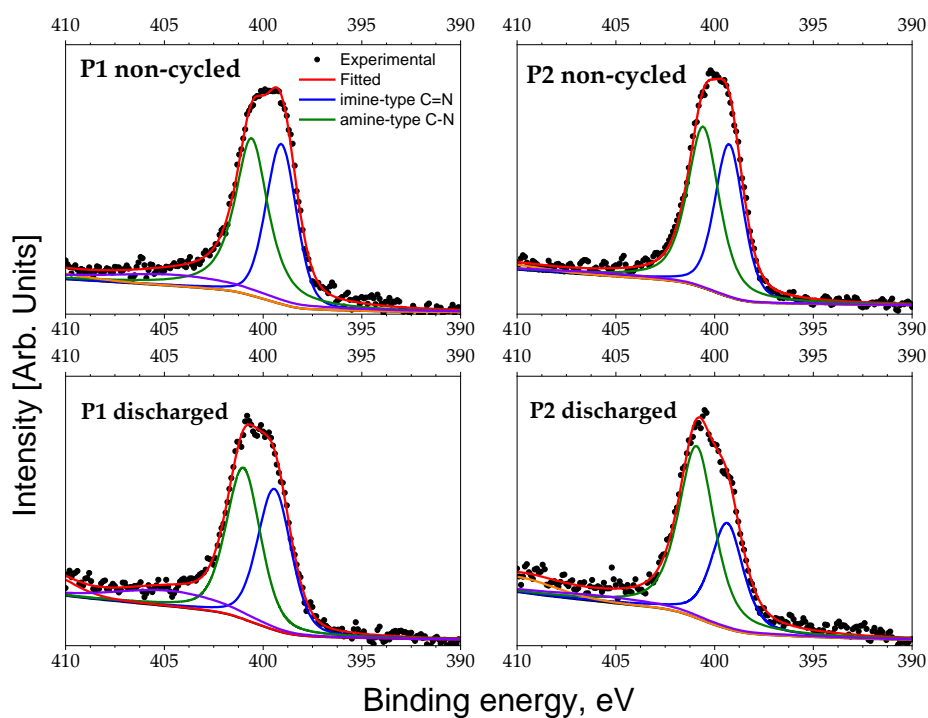

Figure S14. High-resolution XPS N1s spectra of the non-charged and discharged electrodes based on **P1** and **P2**.

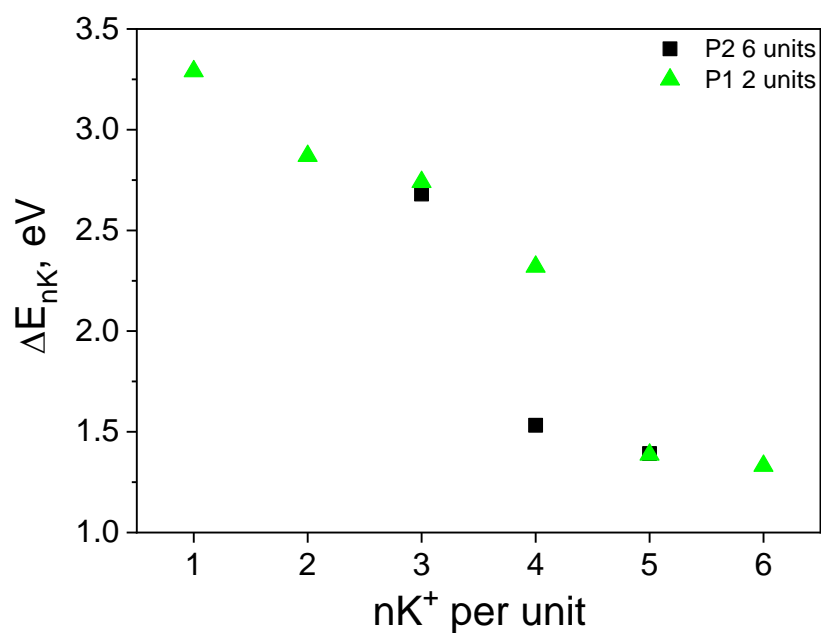

Figure S15. The metalation energies calculated for the stepwise introduction of potassium atoms into the repeating units of polymers **P1** and **P2**.

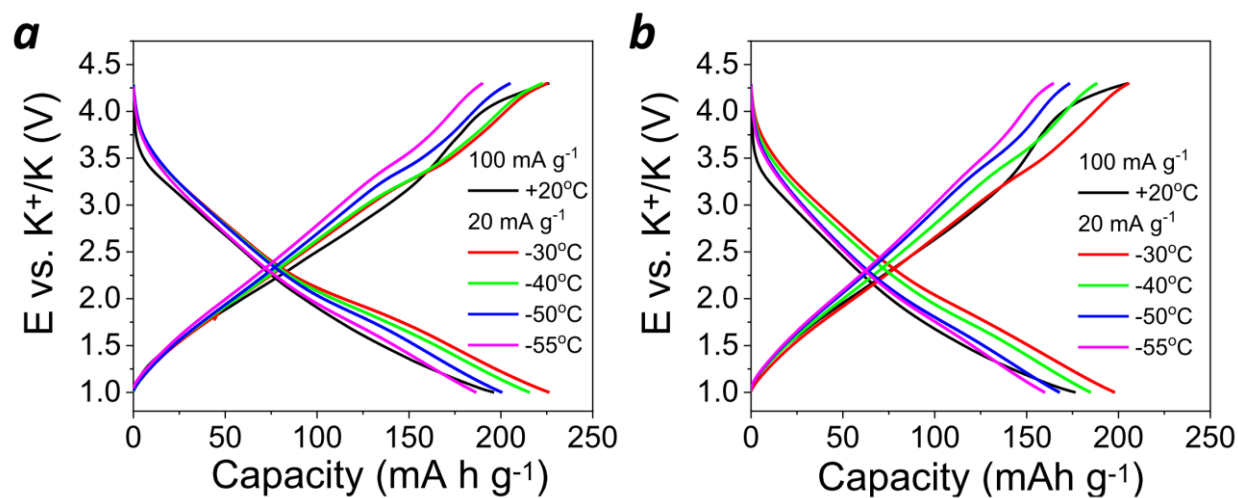

Figure S16. Charge/discharge profiles for the batteries based on **P1** (a) and **P2** (b) at different temperatures and current densities.

### Details of metallation energy calculation

The calculation of the specific metallation energies  $\Delta E_{nK}$  (eV) of the oligomer P

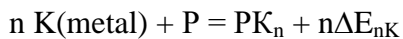

was performed based on the data for the theoretical energy of the reaction with diatomic molecules  $\text{K}_2$

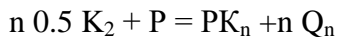

taking into account the semi-empirical correction

$$E_{nK} = Q_n - 0.66 \text{ eV}$$

based on the experimental values of the thermal effect of atomization of metallic potassium and the binding energy in the diatomic molecule  $\text{K}_2$ . Pristine and metallated structures of the oligomers **P1** and **P2** are shown in Figures S17-S18.

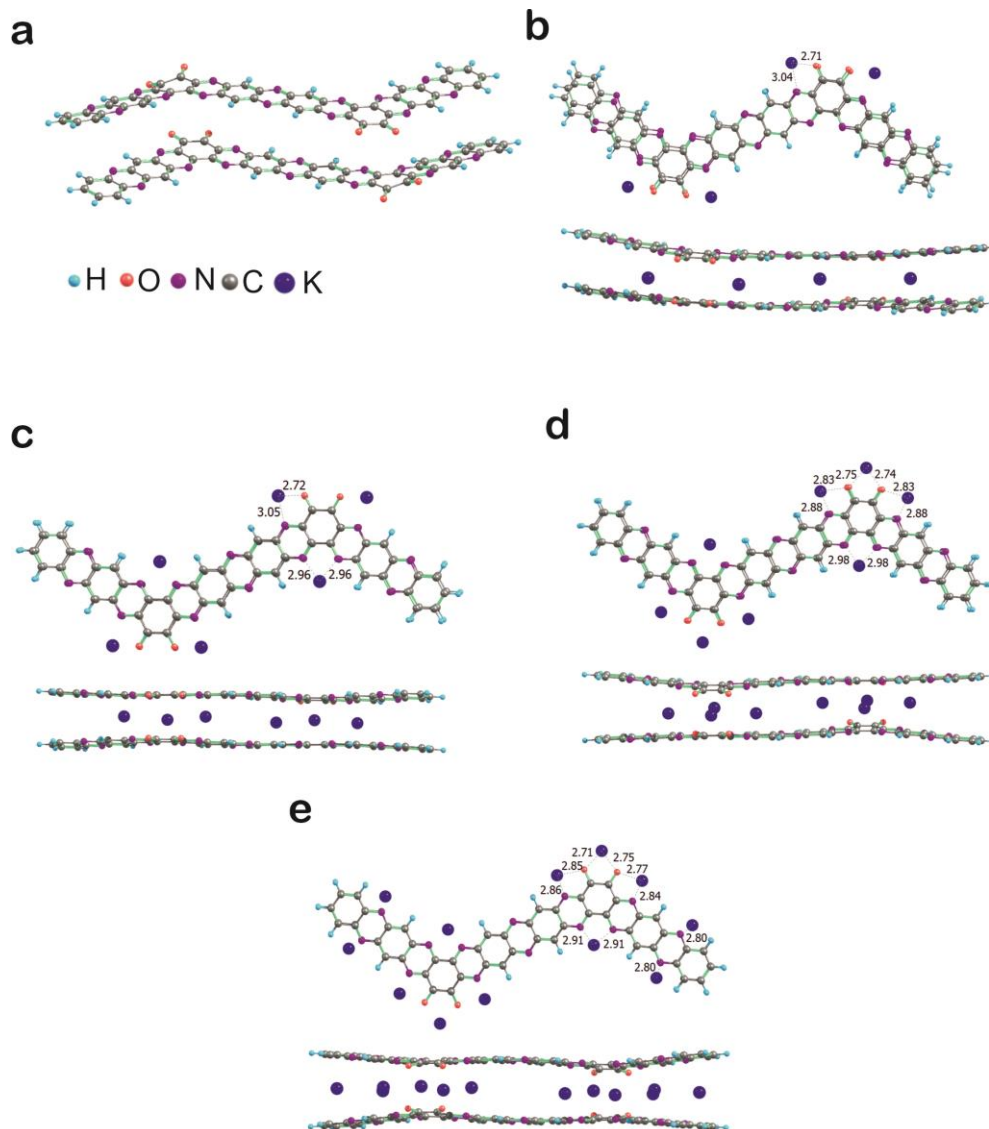

Figure S17. Geometry of the initial stack of two dimers of **P1** (a) and its metalated forms **P1K<sub>n</sub>** (top view and side view): for n=2 per unit (b), n=3 (c), n=4 (d), n=6 (e). Bond lengths are given in Å.

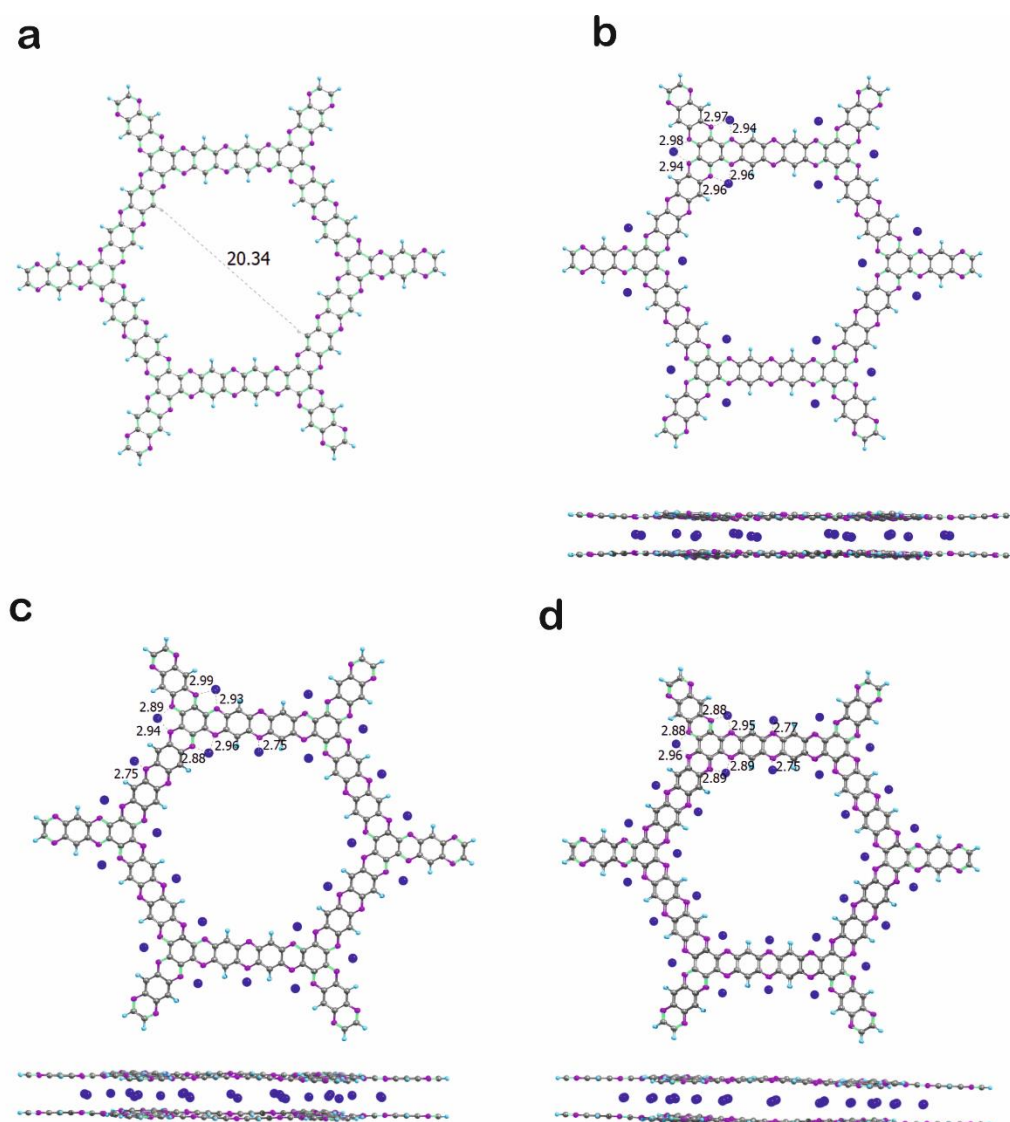

Figure S18. Geometry of the initial stack of two hexamers of **P2** (a) and its metalated forms **P2K<sub>n</sub>** (top view and side view): for n=3 per unit (b), n=4 (c), n=5 (d). Bond lengths are given in Å.

## Cartesian coordinates for the calculated structures

Coordinates of the metalated stack of two **PI** dimers (n=6 K<sup>+</sup> per unit)

|   |               |              |             |
|---|---------------|--------------|-------------|
| 6 | -14.480708110 | 5.449092180  | 2.175117570 |
| 6 | -15.405494610 | 4.396465330  | 2.306807000 |
| 1 | -12.378838120 | 5.976346430  | 2.067550480 |
| 6 | -13.114357680 | 5.167281500  | 2.116679300 |
| 6 | -12.632658090 | 3.837452000  | 2.178544900 |
| 6 | -13.578185960 | 2.757997190  | 2.317793400 |
| 6 | -14.959144520 | 3.076092190  | 2.380681020 |
| 1 | -15.666979650 | 2.256295370  | 2.536810250 |
| 7 | -13.173549860 | 1.449663700  | 2.346761490 |
| 7 | -11.284624590 | 3.591953050  | 2.064734380 |
| 6 | -10.874729410 | 2.306577330  | 2.158220350 |
| 6 | -11.834733860 | 1.204418810  | 2.306993440 |
| 6 | -3.630828490  | -0.280918420 | 2.337772780 |
| 6 | -3.130941600  | -1.642039880 | 2.492610390 |
| 7 | -4.982505770  | -0.046001260 | 2.244279270 |
| 7 | -7.674225310  | 0.439835610  | 2.124566610 |
| 7 | -9.530813710  | -1.695823380 | 2.355868940 |
| 6 | -9.966246500  | -0.415647820 | 2.306902600 |
| 6 | -9.018323610  | 0.682736420  | 2.167400680 |
| 8 | -5.816548100  | -4.759608650 | 2.277152730 |
| 6 | -9.496452710  | 1.997034820  | 2.076095610 |
| 7 | -3.987104490  | -2.691080120 | 2.512229560 |
| 8 | -8.513014890  | -4.271300640 | 2.224601090 |
| 1 | -8.776735150  | 2.818700440  | 2.024083870 |
| 6 | -5.315308920  | -2.434590480 | 2.449899450 |
| 6 | -6.231005060  | -3.565143280 | 2.370725040 |
| 6 | -8.187039850  | -1.912414740 | 2.363360700 |
| 6 | -7.711571370  | -3.296331320 | 2.336959380 |
| 6 | -7.265122200  | -0.827887010 | 2.278959300 |
| 6 | -5.805435590  | -1.087050620 | 2.337865250 |
| 1 | -3.106167570  | 1.805070430  | 2.152986630 |
| 6 | -2.735090040  | 0.782893310  | 2.252369120 |

|   |              |              |             |
|---|--------------|--------------|-------------|
| 6 | -1.331064640 | 0.579473460  | 2.301278810 |
| 6 | -0.826646000 | -0.786005220 | 2.470016440 |
| 6 | -1.738750390 | -1.847540320 | 2.570791860 |
| 1 | -1.346899100 | -2.856971910 | 2.714162570 |
| 7 | 0.510038780  | -1.036934520 | 2.519742750 |
| 6 | 9.968249060  | 0.969333710  | 2.131341100 |
| 6 | 9.018579630  | -0.127454670 | 2.272292740 |
| 7 | 9.534332960  | 2.222395190  | 1.861893410 |
| 8 | 8.519359120  | 4.684862560  | 1.097080280 |
| 8 | 5.824027880  | 5.178576000  | 1.032146020 |
| 7 | 4.984918550  | 0.605975550  | 2.175379730 |
| 7 | 7.674514700  | 0.099949060  | 2.176478340 |
| 7 | 3.991286990  | 3.235086820  | 1.777207100 |
| 6 | 3.134165220  | 2.214512670  | 2.017965150 |
| 6 | 3.633487470  | 0.857426460  | 2.206050880 |
| 6 | 7.267638980  | 1.367204170  | 2.011713960 |
| 6 | 5.808925210  | 1.636824740  | 2.007272490 |
| 6 | 6.236666750  | 4.044119090  | 1.418581220 |
| 6 | 5.319256770  | 2.970209650  | 1.780113230 |
| 6 | 7.716632940  | 3.769920990  | 1.449529280 |
| 6 | 8.190944580  | 2.436087230  | 1.819423550 |
| 1 | 12.059773090 | 1.517543220  | 2.212074690 |
| 6 | 11.347489330 | 0.688139740  | 2.253052440 |
| 6 | 11.835312810 | -0.603663500 | 2.522479690 |
| 6 | 10.873941200 | -1.706784570 | 2.654491160 |
| 6 | 9.495431950  | -1.424563450 | 2.506069850 |
| 1 | 8.775132180  | -2.232557910 | 2.661341910 |
| 7 | 11.282717650 | -2.976634080 | 2.877656830 |
| 7 | 13.174351130 | -0.833801130 | 2.615346200 |
| 6 | 13.577655810 | -2.109312160 | 2.909403100 |
| 1 | 3.108175610  | -1.209427870 | 2.541521320 |
| 6 | 2.737398760  | -0.194423610 | 2.384351370 |
| 6 | 1.333478960  | 0.014611640  | 2.376933250 |
| 6 | 0.829226510  | 1.379339890  | 2.201677470 |
| 6 | 1.741843830  | 2.433040340  | 2.040067680 |

|   |               |              |              |
|---|---------------|--------------|--------------|
| 1 | 1.350170100   | 3.446523590  | 1.928158100  |
| 7 | -0.507599600  | 1.634168160  | 2.183232000  |
| 6 | -11.345737040 | -0.114017960 | 2.361009660  |
| 1 | -12.056018370 | -0.928300540 | 2.533160330  |
| 6 | 15.404423640  | -3.702769070 | 3.296794610  |
| 6 | 14.958745360  | -2.404086860 | 3.045120590  |
| 6 | 14.478631380  | -4.754157220 | 3.430155130  |
| 1 | 15.666944530  | -1.571181380 | 2.995111360  |
| 1 | 14.825356840  | -5.766159770 | 3.644084350  |
| 6 | 13.112106510  | -4.493479310 | 3.308326930  |
| 1 | 12.376078210  | -5.288846970 | 3.462300650  |
| 6 | 12.631017720  | -3.188651900 | 3.043124900  |
| 1 | 16.472338750  | -3.899005290 | 3.406321450  |
| 6 | -14.478638740 | 4.768634540  | -3.404880130 |
| 6 | -15.404759380 | 3.716731200  | -3.277069940 |
| 1 | -12.375878370 | 5.302449970  | -3.435148710 |
| 6 | -13.112279510 | 4.506598290  | -3.285562330 |
| 6 | -12.631858230 | 3.199886640  | -3.028472130 |
| 6 | -13.578818190 | 2.120205580  | -2.901101020 |
| 6 | -14.959727330 | 2.416395840  | -3.033731490 |
| 1 | -15.668853920 | 1.584262580  | -2.986446910 |
| 7 | -13.175484410 | 0.842521210  | -2.616152930 |
| 7 | -11.283564820 | 2.986641570  | -2.863953700 |
| 6 | -10.875261020 | 1.715704570  | -2.647116670 |
| 6 | -11.836709860 | 0.611800880  | -2.522681710 |
| 6 | -3.634050760  | -0.848527600 | -2.210130140 |
| 6 | -3.135551620  | -2.206841930 | -2.028627110 |
| 7 | -4.985449070  | -0.596476760 | -2.176607450 |
| 7 | -7.676319390  | -0.092991640 | -2.174861490 |
| 7 | -9.535364410  | -2.218057730 | -1.875180670 |
| 6 | -9.969612070  | -0.963555980 | -2.137145340 |
| 6 | -9.020340620  | 0.134377090  | -2.270906250 |
| 8 | -5.822397150  | -5.174449680 | -1.058544840 |
| 6 | -9.496970360  | 1.432575240  | -2.498355690 |
| 7 | -3.992697680  | -3.228271930 | -1.793089550 |



|   |              |              |              |
|---|--------------|--------------|--------------|
| 8 | -8.518698760 | -4.685827670 | -1.122836450 |
| 1 | -8.776478870 | 2.241345910  | -2.648648590 |
| 6 | -5.320493940 | -2.962743300 | -1.794176740 |
| 6 | -6.236665660 | -4.038769850 | -1.440409100 |
| 6 | -8.191737810 | -2.431981020 | -1.832905500 |
| 6 | -7.717052380 | -3.768396500 | -1.471031160 |
| 6 | -7.268746260 | -1.360769530 | -2.017278950 |
| 6 | -5.809416910 | -1.628095640 | -2.013291940 |
| 1 | -3.106684680 | 1.218992410  | -2.539137870 |
| 6 | -2.737010750 | 0.202951070  | -2.386083460 |
| 6 | -1.333240430 | -0.007841950 | -2.382083190 |
| 6 | -0.830208880 | -1.373495280 | -2.210698370 |
| 6 | -1.743598250 | -2.426709650 | -2.052157950 |
| 1 | -1.352980730 | -3.441049960 | -1.944447910 |
| 7 | 0.506194370  | -1.630058350 | -2.192856910 |
| 6 | 9.966633660  | 0.406028650  | -2.311950260 |
| 6 | 9.016928190  | -0.690419800 | -2.169334040 |
| 7 | 9.533073620  | 1.686710990  | -2.366683350 |
| 8 | 8.519423630  | 4.263890820  | -2.244800920 |
| 8 | 5.823059130  | 4.756314310  | -2.300507670 |
| 7 | 4.982702160  | 0.044165810  | -2.251939420 |
| 7 | 7.673179100  | -0.445473650 | -2.129217470 |
| 7 | 3.991099920  | 2.689924400  | -2.525920560 |
| 6 | 3.133319690  | 1.642362380  | -2.503205640 |
| 6 | 3.631471380  | 0.280828690  | -2.346481760 |
| 6 | 7.266231430  | 0.822378790  | -2.288480200 |
| 6 | 5.807178770  | 1.083725330  | -2.348451470 |
| 6 | 6.236152740  | 3.561106390  | -2.389566590 |
| 6 | 5.318904930  | 2.431591230  | -2.464266040 |
| 6 | 7.716391850  | 3.290065380  | -2.354384930 |
| 6 | 8.189808740  | 1.905185810  | -2.376036090 |
| 1 | 12.058005600 | 0.915125900  | -2.532719220 |
| 6 | 11.345660560 | 0.102502490  | -2.361980580 |
| 6 | 11.832860620 | -1.215879220 | -2.299300270 |
| 6 | 10.871163800 | -2.316304800 | -2.148518200 |

|    |               |              |              |
|----|---------------|--------------|--------------|
| 6  | 9.493143540   | -2.004942490 | -2.071489610 |
| 1  | 8.772394600   | -2.825518750 | -2.016976620 |
| 7  | 11.279102080  | -3.601943150 | -2.048157130 |
| 7  | 13.171679210  | -1.462892270 | -2.333856840 |
| 6  | 13.574144200  | -2.771689310 | -2.300358560 |
| 1  | 3.104120840   | -1.804250800 | -2.160117150 |
| 6  | 2.734424780   | -0.781676750 | -2.260380970 |
| 6  | 1.330792460   | -0.576270030 | -2.309828660 |
| 6  | 0.827866140   | 0.789843580  | -2.477611930 |
| 6  | 1.741446330   | 1.850071670  | -2.579670020 |
| 1  | 1.350900940   | 2.859903690  | -2.723814890 |
| 7  | -0.508561900  | 1.042766660  | -2.524728070 |
| 6  | -11.349015620 | -0.681560260 | -2.258565240 |
| 1  | -12.060690930 | -1.512032120 | -2.226410840 |
| 6  | 15.399739140  | -4.412888320 | -2.280664290 |
| 6  | 14.954884380  | -3.092138050 | -2.360249920 |
| 6  | 14.473442360  | -5.463713630 | -2.146116720 |
| 1  | 15.663558180  | -2.273680270 | -2.520521980 |
| 1  | 14.819333400  | -6.497377960 | -2.101537240 |
| 6  | 13.107276800  | -5.179493890 | -2.090779630 |
| 1  | 12.370643470  | -5.987505460 | -2.039947180 |
| 6  | 12.626965370  | -3.849540780 | -2.158602200 |
| 1  | 16.467444430  | -4.630859660 | -2.339402770 |
| 1  | -14.825126030 | 5.782076560  | -3.612278320 |
| 1  | -16.472728560 | 3.914201250  | -3.383753610 |
| 1  | -16.473420360 | 4.612903530  | 2.367067250  |
| 1  | -14.828225900 | 6.482403830  | 2.134724890  |
| 19 | 3.533813420   | 4.748460580  | -0.601693790 |
| 19 | -3.530517890  | -4.744507860 | 0.581106670  |
| 19 | 10.510853490  | 3.536463840  | -0.454042530 |
| 19 | -10.503445570 | -3.543461820 | 0.437247130  |
| 19 | -5.948912600  | 1.276025830  | -0.163864630 |
| 19 | 5.948364040   | -1.268680330 | 0.163035690  |
| 19 | 7.441637790   | 6.341229610  | -0.809119640 |
| 19 | -7.434206770  | -6.343020380 | 0.780952850  |

|    |               |              |              |
|----|---------------|--------------|--------------|
| 19 | 10.828033740  | -4.520084630 | 0.571370440  |
| 19 | 14.309876370  | -0.581113510 | 0.067763500  |
| 19 | -14.261603530 | 0.526174450  | -0.058239180 |
| 19 | -10.828835460 | 4.518663580  | -0.550143800 |

Coordinates of the metalated stack of two **P2** hexamers (n=5 K<sup>+</sup> per unit)

|   |               |              |               |
|---|---------------|--------------|---------------|
| 6 | -14.858906920 | -3.973907390 | -9.633650370  |
| 7 | -13.598678720 | -3.446750970 | -9.645526160  |
| 7 | -11.083488070 | -2.324076970 | -9.653534190  |
| 7 | -9.805932930  | -1.715842580 | -7.198113110  |
| 6 | -9.212435380  | -1.410058260 | -8.381311820  |
| 6 | -9.870859520  | -1.720707890 | -9.641487640  |
| 6 | -15.527975750 | -4.256797780 | -8.375416260  |
| 7 | -13.670289150 | -3.406453060 | -4.797883230  |
| 6 | -7.938967380  | -0.803894780 | -8.408165930  |
| 6 | -9.215222550  | -1.401951360 | -10.850803380 |
| 7 | -14.906871650 | -3.998169880 | -7.186501060  |
| 7 | -11.083661010 | -2.248235190 | -4.800594580  |
| 6 | -11.743236480 | -2.465898420 | -3.633001980  |
| 6 | -13.072233640 | -3.059118250 | -3.633280370  |
| 1 | -9.748904320  | -1.566133690 | -11.792112400 |
| 1 | -7.478227940  | -0.508606340 | -7.460376890  |
| 6 | -13.695495930 | -3.424231730 | -7.217623940  |
| 6 | -13.032572240 | -3.110482820 | -5.953018050  |
| 6 | -11.048359940 | -2.241697880 | -7.227356370  |
| 6 | -11.726448820 | -2.524795710 | -5.954660890  |
| 6 | -11.693093670 | -2.549922470 | -8.467734480  |
| 6 | -13.028731820 | -3.144116090 | -8.470174770  |
| 6 | -7.285154040  | -0.483626370 | -9.613057840  |
| 6 | -7.947079220  | -0.796474640 | -10.881800780 |
| 7 | -6.039036710  | 0.066038040  | -9.589963350  |
| 6 | -9.213194660  | -1.409898280 | 8.383461050   |
| 6 | -9.872046040  | -1.719666080 | 9.643630210   |
| 7 | -9.806861010  | -1.715259510 | 7.200230930   |
| 7 | -11.085204280 | -2.245421460 | 4.802610790   |
| 7 | -13.671671890 | -3.403860760 | 4.799451170   |
| 6 | -13.073426360 | -3.056720130 | 3.634928750   |
| 6 | -11.744481550 | -2.463382080 | 3.634858120   |
| 7 | -13.599454590 | -3.447746160 | 9.646862420   |
| 6 | -13.719698620 | -3.284305910 | 2.400302720   |

|   |               |              |              |
|---|---------------|--------------|--------------|
| 6 | -11.143564340 | -2.136952850 | 2.400847180  |
| 7 | -11.084961020 | -2.322648560 | 9.655699390  |
| 7 | -14.908526810 | -3.995676980 | 7.187585300  |
| 6 | -15.529132200 | -4.256159800 | 8.376344590  |
| 6 | -14.859340810 | -3.975669800 | 9.634711410  |
| 1 | -10.176388800 | -1.624524780 | 2.407835360  |
| 1 | -14.747896690 | -3.658980350 | 2.411171530  |
| 6 | -11.694677330 | -2.548165370 | 8.469916070  |
| 6 | -13.029826820 | -3.143354220 | 8.471715090  |
| 6 | -13.034070560 | -3.107958100 | 5.954654040  |
| 6 | -13.696849610 | -3.422399300 | 7.219092830  |
| 6 | -11.728022810 | -2.522201220 | 5.956620960  |
| 6 | -11.049711440 | -2.239911540 | 7.229441840  |
| 1 | -7.478236910  | -0.510444120 | 7.462278520  |
| 6 | -7.939229410  | -0.804874710 | 8.410221240  |
| 6 | -7.285340690  | -0.484492060 | 9.615005300  |
| 6 | -7.947967210  | -0.795560410 | 10.883803380 |
| 6 | -9.216420430  | -1.400545360 | 10.852904250 |
| 1 | -9.750490230  | -1.563535590 | 11.794201700 |
| 7 | -7.333371030  | -0.547381150 | 12.073533890 |
| 1 | -15.027624880 | -4.041663130 | 11.796261700 |
| 6 | -15.508117170 | -4.271482220 | 10.843400880 |
| 6 | -16.797550080 | -4.833828890 | 10.855576420 |
| 6 | -17.465779220 | -5.113499690 | 9.600114350  |
| 6 | -16.814807870 | -4.818418420 | 8.388435170  |
| 1 | -17.340348420 | -5.009897380 | 7.451035110  |
| 7 | -18.723817380 | -5.656415670 | 9.575995890  |
| 7 | -17.405005880 | -5.104498640 | 12.053821180 |
| 6 | -18.614748070 | -5.639083350 | 11.986669920 |
| 6 | -19.270653830 | -5.913567670 | 10.754366560 |
| 1 | -19.114786120 | -5.864033160 | 12.934549090 |
| 1 | -20.275142190 | -6.349590040 | 10.754466110 |
| 1 | -17.338549620 | -5.012683660 | -7.450573780 |
| 6 | -16.813461870 | -4.819484700 | -8.387890260 |
| 6 | -17.465207340 | -5.112051850 | -9.599758870 |

|   |               |              |               |
|---|---------------|--------------|---------------|
| 6 | -16.797721810 | -4.829834680 | -10.855061310 |
| 6 | -15.508218560 | -4.267671500 | -10.842529010 |
| 1 | -15.028000480 | -4.036589170 | -11.795221740 |
| 7 | -17.405775270 | -5.098331150 | -12.053490290 |
| 7 | -18.723289280 | -5.654902730 | -9.575960000  |
| 6 | -19.270772800 | -5.909663160 | -10.754537420 |
| 6 | -18.615523420 | -5.632918820 | -11.986656650 |
| 1 | -20.275414080 | -6.345341170 | -10.754946090 |
| 1 | -19.116076460 | -5.856072740 | -12.934690830 |
| 1 | -10.175608350 | -1.626155870 | -2.406107490  |
| 6 | -11.142668690 | -2.138814100 | -2.398980700  |
| 6 | -11.787481750 | -2.361950380 | -1.167182570  |
| 6 | -13.124478280 | -2.960615510 | -1.167353650  |
| 6 | -13.718829010 | -3.286073720 | -2.398687760  |
| 1 | -14.747098300 | -3.660570240 | -2.409582310  |
| 7 | -13.766464010 | -3.239830830 | 0.000794440   |
| 7 | -11.151795370 | -2.067263300 | 0.000910140   |
| 6 | -11.787922360 | -2.361035870 | 1.168970050   |
| 6 | -13.124931140 | -2.959683850 | 1.168972270   |
| 6 | 11.347777230  | 7.165837460  | 3.634726290   |
| 7 | 12.014119580  | 7.350102120  | 4.799452200   |
| 7 | 13.302435100  | 7.817594650  | 7.188448630   |
| 7 | 11.989272880  | 7.277568950  | 9.647269140   |
| 6 | 13.249456050  | 7.804815790  | 9.635556320   |
| 6 | 13.921692390  | 8.080388330  | 8.377437770   |
| 6 | 9.993941890   | 6.631685870  | 3.634410390   |
| 7 | 8.098961750   | 5.779505950  | 7.199401070   |
| 6 | 13.913282040  | 8.063294290  | 10.844636340  |
| 6 | 15.225007270  | 8.600443030  | 8.390230750   |
| 7 | 9.376142670   | 6.314411630  | 4.802025500   |
| 7 | 9.426117690   | 6.268923950  | 9.655193870   |
| 6 | 8.146104430   | 5.826427340  | 9.642730650   |
| 6 | 7.463967780   | 5.572448450  | 8.382420200   |
| 1 | 15.732206300  | 8.837031060  | 7.453004360   |
| 1 | 13.410171430  | 7.886262790  | 11.797108900  |

|   |              |             |              |
|---|--------------|-------------|--------------|
| 6 | 10.022768540 | 6.581369470 | 5.956168720  |
| 6 | 9.344644680  | 6.297893350 | 7.228786150  |
| 6 | 11.374882490 | 7.080902820 | 8.471698580  |
| 6 | 10.015192790 | 6.544238760 | 8.469175940  |
| 6 | 12.043443730 | 7.357237200 | 7.219187650  |
| 6 | 11.355670370 | 7.103226050 | 5.954537480  |
| 6 | 15.219255930 | 8.586075230 | 10.857467860 |
| 6 | 15.890054930 | 8.860755680 | 9.602267160  |
| 7 | 15.836354130 | 8.832488020 | 12.056004220 |
| 7 | 17.160210830 | 9.374639390 | 9.578740520  |
| 6 | 17.725260930 | 9.587170210 | 10.757449980 |
| 6 | 17.066817360 | 9.317566650 | 11.989453020 |
| 6 | -0.134413810 | 2.198310730 | 18.005131960 |
| 6 | -1.475425040 | 1.639254770 | 18.005686940 |
| 7 | 0.505331950  | 2.464379580 | 16.827767360 |
| 7 | 1.754524190  | 3.060158900 | 14.447724080 |
| 7 | 0.417932280  | 2.579390170 | 11.995500490 |
| 6 | 1.650685450  | 3.150382140 | 12.011355420 |
| 6 | 2.334863020  | 3.398883830 | 13.271610870 |
| 7 | -3.417228010 | 0.896242880 | 14.449186860 |
| 6 | 2.297952090  | 3.493109060 | 10.805410650 |
| 6 | 3.621942680  | 3.978299720 | 13.247729290 |
| 7 | -2.115579910 | 1.371572260 | 16.828935500 |
| 7 | -2.136562550 | 1.508316920 | 11.996369100 |
| 6 | -3.408237960 | 1.030468620 | 12.012732340 |
| 6 | -4.065652810 | 0.719022790 | 13.273269260 |
| 1 | 4.101003550  | 4.227061270 | 14.199488180 |
| 1 | 1.750520110  | 3.374522790 | 9.864875630  |
| 6 | -1.496444400 | 1.695765070 | 15.684644490 |
| 6 | -2.181607070 | 1.444666750 | 14.417861950 |
| 6 | -0.179164910 | 2.322861840 | 13.178579640 |
| 6 | -1.534737570 | 1.755148710 | 13.179142760 |
| 6 | 0.496951880  | 2.564976200 | 14.416977760 |
| 6 | -0.161780860 | 2.252705070 | 15.684169530 |
| 1 | 17.576395020 | 9.518711190 | 12.937601210 |

|   |              |              |              |
|---|--------------|--------------|--------------|
| 1 | 18.741200220 | 9.995790430  | 10.758002080 |
| 1 | 1.508518650  | 2.889356020  | 19.241336680 |
| 6 | 0.511507220  | 2.445132050  | 19.226275420 |
| 6 | -0.120046060 | 2.161637030  | 20.450895740 |
| 6 | -1.457850980 | 1.603777220  | 20.451393060 |
| 6 | -2.104628440 | 1.354484550  | 19.227297150 |
| 1 | -3.122024110 | 0.959169010  | 19.243026050 |
| 7 | -2.103713550 | 1.320374500  | 21.626418580 |
| 7 | 0.536508830  | 2.421590670  | 21.625389450 |
| 6 | -0.117497520 | 2.123036120  | 22.737499090 |
| 6 | -1.430615290 | 1.575306540  | 22.737991270 |
| 1 | 0.392568210  | 2.322259060  | 23.685789730 |
| 1 | -1.930407730 | 1.353199940  | 23.686675420 |
| 1 | -5.896939590 | 0.049050040  | 14.201663290 |
| 6 | -5.382102180 | 0.209102390  | 13.249329560 |
| 6 | -6.081539410 | -0.011637310 | 12.050499820 |
| 6 | -5.420013350 | 0.301235910  | 10.781484710 |
| 6 | -4.106361840 | 0.808677290  | 10.806910850 |
| 1 | -3.637420460 | 1.114902440  | 9.866327100  |
| 7 | -6.038658720 | 0.063813410  | 9.591734290  |
| 1 | 8.297967590  | 6.097523580  | 2.407298210  |
| 6 | 9.340851580  | 6.429897080  | 2.400287690  |
| 6 | 9.951948580  | 6.733333370  | 1.168523140  |
| 6 | 11.314422390 | 7.271560700  | 1.168681830  |
| 6 | 11.962483240 | 7.469047120  | 2.400125330  |
| 1 | 12.949259850 | 7.942164400  | 2.411115090  |
| 7 | 11.962867940 | 7.535556160  | 0.000531620  |
| 7 | 9.297579090  | 6.483489220  | 0.000397220  |
| 1 | 7.946980200  | 5.856892150  | 11.792443430 |
| 6 | 7.457901290  | 5.584057670  | 10.851907310 |
| 6 | 6.136874630  | 5.103465890  | 10.882913750 |
| 6 | 5.450752800  | 4.849341120  | 9.613718740  |
| 6 | 6.138812430  | 5.089382680  | 8.409148400  |
| 1 | 5.605872530  | 4.967243090  | 7.461032390  |
| 7 | 4.184988490  | 4.346852500  | 9.590360890  |



|   |              |             |               |
|---|--------------|-------------|---------------|
| 7 | 5.529371430  | 4.838326680 | 12.072271880  |
| 6 | 4.269074570  | 4.322359000 | 12.049162950  |
| 6 | 3.581454630  | 4.072618000 | 10.780220150  |
| 6 | 11.348142840 | 7.166077050 | -3.633817410  |
| 7 | 12.014485710 | 7.350532240 | -4.798589040  |
| 7 | 13.302213300 | 7.818202590 | -7.188074810  |
| 7 | 11.987906700 | 7.279785610 | -9.646635270  |
| 6 | 13.248042270 | 7.807111730 | -9.635166080  |
| 6 | 13.920959630 | 8.081592470 | -8.377166030  |
| 6 | 9.994426900  | 6.631691770 | -3.633453090  |
| 7 | 8.099208910  | 5.778963970 | -7.198108590  |
| 6 | 13.911193590 | 8.066672780 | -10.844392570 |
| 6 | 15.224384000 | 8.601384940 | -8.390245640  |
| 7 | 9.376581470  | 6.314328840 | -4.801024680  |
| 7 | 9.425895140  | 6.268784730 | -9.654068120  |
| 6 | 8.146152220  | 5.825582210 | -9.641454740  |
| 6 | 7.464180940  | 5.571550600 | -8.381063310  |
| 1 | 15.732178410 | 8.837037890 | -7.453108060  |
| 1 | 13.407520430 | 7.890582230 | -11.796744260 |
| 6 | 10.022988510 | 6.581528760 | -5.955117740  |
| 6 | 9.344715980  | 6.297851660 | -7.227648050  |
| 6 | 11.374224250 | 7.081938970 | -8.470892500  |
| 6 | 10.014898540 | 6.544478930 | -8.468143090  |
| 6 | 12.043186210 | 7.357665630 | -7.218537590  |
| 6 | 11.355985290 | 7.103722170 | -5.953626230  |
| 6 | 15.217279150 | 8.589193670 | -10.857489990 |
| 6 | 15.888845410 | 8.862541470 | -9.602410530  |
| 7 | 15.833758960 | 8.836639420 | -12.056129540 |
| 7 | 17.159189550 | 9.375981780 | -9.579077990  |
| 6 | 17.723541610 | 9.589711740 | -10.757899930 |
| 6 | 17.064339780 | 9.321481630 | -11.989792330 |
| 6 | -0.134218810 | 2.197118940 | -18.003988260 |
| 6 | -1.474776230 | 1.636983340 | -18.004497220 |
| 7 | 0.505515470  | 2.463327090 | -16.826654390 |
| 7 | 1.755347590  | 3.057923940 | -14.446562140 |

|   |              |              |               |
|---|--------------|--------------|---------------|
| 7 | 0.418234230  | 2.578368730  | -11.994371330 |
| 6 | 1.651088260  | 3.149082090  | -12.010199320 |
| 6 | 2.335575110  | 3.396870010  | -13.270437060 |
| 7 | -3.416085350 | 0.893237500  | -14.447650440 |
| 6 | 2.298138950  | 3.492073450  | -10.804201690 |
| 6 | 3.622816300  | 3.975836880  | -13.246409420 |
| 7 | -2.114691970 | 1.368903830  | -16.827708770 |
| 7 | -2.136380450 | 1.508397200  | -11.995067090 |
| 6 | -3.408252160 | 1.031101060  | -12.011334300 |
| 6 | -4.064857540 | 0.717325250  | -13.271738900 |
| 1 | 4.102142820  | 4.224138750  | -14.198156220 |
| 1 | 1.750488220  | 3.373742910  | -9.863763900  |
| 6 | -1.495756400 | 1.693539430  | -15.683399930 |
| 6 | -2.180904710 | 1.442639260  | -14.416577270 |
| 6 | -0.178692980 | 2.321575770  | -13.177478510 |
| 6 | -1.534363890 | 1.754168180  | -13.177957610 |
| 6 | 0.497565210  | 2.563240900  | -14.415862160 |
| 6 | -0.161303350 | 2.251029470  | -15.682998690 |
| 1 | 17.573412400 | 9.523496590  | -12.938024500 |
| 1 | 18.739549790 | 9.998163900  | -10.758627570 |
| 1 | 1.508028210  | 2.889703550  | -19.240223760 |
| 6 | 0.511386550  | 2.444645750  | -19.225149050 |
| 6 | -0.120035890 | 2.160765200  | -20.449747340 |
| 6 | -1.457332940 | 1.601691210  | -20.450236510 |
| 6 | -2.103802620 | 1.351755900  | -19.226100550 |
| 1 | -3.120866730 | 0.955587530  | -19.241824290 |
| 7 | -2.103036580 | 1.317778310  | -21.625220390 |
| 7 | 0.536176550  | 2.421388430  | -21.624285680 |
| 6 | -0.117621930 | 2.122251080  | -22.736377060 |
| 6 | -1.430220880 | 1.573302350  | -22.736826350 |
| 1 | 0.392212450  | 2.321959490  | -23.684689790 |
| 1 | -1.929862890 | 1.350761610  | -23.685486630 |
| 1 | -5.895074770 | 0.044155100  | -14.199861500 |
| 6 | -5.380840510 | 0.206316880  | -13.247558220 |
| 6 | -6.080709960 | -0.012960830 | -12.048736730 |

|   |               |              |               |
|---|---------------|--------------|---------------|
| 6 | -5.420168590  | 0.302517860  | -10.779823980 |
| 6 | -4.106761610  | 0.810631450  | -10.805450350 |
| 1 | -3.638105590  | 1.117903820  | -9.865070880  |
| 7 | -7.332107350  | -0.549597060 | -12.071578320 |
| 1 | 8.298558860   | 6.096903820  | -2.406581980  |
| 6 | 9.341314510   | 6.429642520  | -2.399419450  |
| 6 | 9.952175480   | 6.733248130  | -1.167637800  |
| 6 | 11.314580660  | 7.271606850  | -1.167723930  |
| 6 | 11.962722840  | 7.469256560  | -2.399138620  |
| 1 | 12.949459970  | 7.942462620  | -2.410001360  |
| 1 | 7.947197950   | 5.855368800  | -11.791128200 |
| 6 | 7.458129540   | 5.582656430  | -10.850558760 |
| 6 | 6.137370560   | 5.101511630  | -10.881522990 |
| 6 | 5.451137590   | 4.847763880  | -9.612343760  |
| 6 | 6.139113270   | 5.088206170  | -8.407773520  |
| 1 | 5.606093720   | 4.966271860  | -7.459673570  |
| 7 | 4.185273350   | 4.345492470  | -9.588973830  |
| 7 | 5.530160860   | 4.835780890  | -12.070866220 |
| 6 | 4.269767730   | 4.320144470  | -12.047811260 |
| 6 | 3.581839450   | 4.071096310  | -10.778874580 |
| 6 | -13.248907010 | -7.805846770 | -9.635401610  |
| 7 | -11.989723080 | -7.276182320 | -9.647250230  |
| 7 | -9.426533940  | -6.267904340 | -9.655113410  |
| 7 | -8.098088640  | -5.781077030 | -7.199514160  |
| 6 | -7.463823540  | -5.572338400 | -8.382691150  |
| 6 | -8.146488120  | -5.825197650 | -9.642903210  |
| 6 | -13.919225490 | -8.086017260 | -8.377250470  |
| 7 | -12.011760680 | -7.354771540 | -4.799595200  |
| 6 | -6.138984540  | -5.088550050 | -8.409557540  |
| 6 | -7.459323660  | -5.581610430 | -10.852183710 |
| 7 | -13.299698000 | -7.823882240 | -7.188257890  |
| 7 | -9.373540030  | -6.319714910 | -4.802156320  |
| 6 | -9.991136340  | -6.637515840 | -3.634561650  |
| 6 | -11.345286450 | -7.170783810 | -3.634883030  |
| 1 | -7.949991510  | -5.848578030 | -11.793359530 |

|   |               |              |               |
|---|---------------|--------------|---------------|
| 1 | -5.605690330  | -4.966441400 | -7.461675020  |
| 6 | -12.041796980 | -7.360680360 | -7.219359850  |
| 6 | -11.353680510 | -7.107186230 | -5.954710910  |
| 6 | -9.343522770  | -6.299806210 | -7.228888680  |
| 6 | -10.020835590 | -6.585208920 | -5.956276440  |
| 6 | -10.014859380 | -6.544488600 | -8.469329680  |
| 6 | -11.374558930 | -7.081350760 | -8.471858720  |
| 6 | -5.451852780  | -4.847684550 | -9.614433750  |
| 6 | -6.138579180  | -5.101565040 | -10.883154650 |
| 7 | -4.186368800  | -4.344132940 | -9.591415010  |
| 6 | -7.464234590  | -5.571054110 | 8.381295300   |
| 6 | -8.146981610  | -5.823838000 | 9.641487240   |
| 7 | -8.098417990  | -5.779948580 | 7.198092950   |
| 7 | -9.373776390  | -6.319128710 | 4.800758640   |
| 7 | -12.012202260 | -7.353742210 | 4.798278520   |
| 6 | -11.345678830 | -7.169946820 | 3.633557270   |
| 6 | -9.991399370  | -6.636963640 | 3.633195250   |
| 7 | -11.989455510 | -7.276410260 | 9.645988010   |
| 6 | -11.960803290 | -7.472052740 | 2.398947940   |
| 6 | -9.337648700  | -6.436723070 | 2.399141210   |
| 7 | -9.426922630  | -6.266798750 | 9.653682460   |
| 7 | -13.299722050 | -7.823755840 | 7.187082190   |
| 6 | -13.918958170 | -8.086410390 | 8.376107350   |
| 6 | -13.248323690 | -7.806818270 | 9.634227450   |
| 1 | -8.294503330  | -6.105271370 | 2.406124200   |
| 1 | -12.948223060 | -7.943857590 | 2.409936030   |
| 6 | -10.015195410 | -6.543435070 | 8.467910400   |
| 6 | -11.374670130 | -7.080828390 | 8.470525540   |
| 6 | -11.354040780 | -7.106246010 | 5.953401850   |
| 6 | -12.041985220 | -7.360122090 | 7.218066540   |
| 6 | -10.021166000 | -6.584314020 | 5.954908290   |
| 6 | -9.343874570  | -6.298671930 | 7.227478770   |
| 1 | -5.605954000  | -4.965504790 | 7.460398460   |
| 6 | -6.139388680  | -5.087290870 | 8.408249130   |
| 6 | -5.452492410  | -4.846008730 | 9.613195670   |

|   |               |               |               |
|---|---------------|---------------|---------------|
| 6 | -6.139501620  | -5.099415640  | 10.881862120  |
| 6 | -7.460076370  | -5.579823520  | 10.850795690  |
| 1 | -7.950921370  | -5.846408970  | 11.791981870  |
| 7 | -5.532284230  | -4.834662570  | 12.071753210  |
| 1 | -13.409704670 | -7.887024380  | 11.795810440  |
| 6 | -13.911801210 | -8.066345980  | 10.843247190  |
| 6 | -15.215853090 | -8.593869550  | 10.856003850  |
| 6 | -15.885389250 | -8.871632050  | 9.600811110   |
| 6 | -15.220690310 | -8.610406920  | 8.388813340   |
| 1 | -15.726652230 | -8.849360880  | 7.451607250   |
| 7 | -17.153858330 | -9.389736560  | 9.577288760   |
| 7 | -15.832132530 | -8.842330380  | 12.054559220  |
| 6 | -17.060634100 | -9.332288710  | 11.988002240  |
| 6 | -17.718086660 | -9.604333540  | 10.755984110  |
| 1 | -17.569431300 | -9.535415960  | 12.936151290  |
| 1 | -18.732616590 | -10.016448870 | 10.756566160  |
| 1 | -15.726776800 | -8.849110390  | -7.452627400  |
| 6 | -15.221055500 | -8.609780120  | -8.389868410  |
| 6 | -15.886580940 | -8.869257260  | -9.601783160  |
| 6 | -15.217771250 | -8.589874840  | -10.857008270 |
| 6 | -13.913264810 | -8.063473580  | -10.844345930 |
| 1 | -13.411779390 | -7.882956860  | -11.797007540 |
| 7 | -15.835332380 | -8.835304390  | -12.055517340 |
| 7 | -17.155353790 | -9.386619580  | -9.578162690  |
| 6 | -17.720882710 | -9.597979840  | -10.756815980 |
| 6 | -17.064414060 | -9.323795940  | -11.988857900 |
| 1 | -18.735761840 | -10.009239010 | -10.757325380 |
| 1 | -17.574396380 | -9.524177130  | -12.936952530 |
| 1 | -8.294347880  | -6.105589460  | -2.407432370  |
| 6 | -9.337474380  | -6.437109570  | -2.400483490  |
| 6 | -9.948714920  | -6.740392770  | -1.168715950  |
| 6 | -11.312314610 | -7.275721220  | -1.168862900  |
| 6 | -11.960469430 | -7.472834640  | -2.400288640  |
| 1 | -12.947969950 | -7.944463180  | -2.411162150  |
| 7 | -11.961477790 | -7.537790890  | -0.000661030  |

|   |               |              |              |
|---|---------------|--------------|--------------|
| 7 | -9.293402360  | -6.492407700 | -0.000666530 |
| 6 | -9.948832230  | -6.740100300 | 1.167365960  |
| 6 | -11.312439170 | -7.275412920 | 1.167522530  |
| 6 | 13.071288960  | 3.055181410  | 3.633487350  |
| 7 | 13.670905100  | 3.400186980  | 4.797932460  |
| 7 | 14.909342300  | 3.989033600  | 7.186129770  |
| 7 | 13.601453040  | 3.438904270  | 9.645586400  |
| 6 | 14.861933230  | 3.965451870  | 9.633287540  |
| 6 | 15.531183470  | 4.246866310  | 8.374849430  |
| 6 | 11.740020760  | 2.467046460  | 3.633510750  |
| 7 | 9.803767300   | 1.717314440  | 7.199234920  |
| 6 | 15.511667190  | 4.259164130  | 10.841963730 |
| 6 | 16.817498650  | 4.807673830  | 8.386896340  |
| 7 | 11.080493220  | 2.250595480  | 4.801366750  |
| 7 | 11.084471160  | 2.319447130  | 9.654524510  |
| 6 | 9.870504120   | 1.718959700  | 9.642554170  |
| 6 | 9.210515260   | 1.411273050  | 8.382442630  |
| 1 | 17.342744050  | 4.999639930  | 7.449407890  |
| 1 | 15.031636890  | 4.028402490  | 11.794836890 |
| 6 | 11.725070650  | 2.523602840  | 5.955267960  |
| 6 | 11.047487040  | 2.240311670  | 7.228159390  |
| 6 | 13.030420360  | 3.137330430  | 8.470376520  |
| 6 | 11.693858690  | 2.545407800  | 8.468332620  |
| 6 | 13.696946500  | 3.417252900  | 7.217596640  |
| 6 | 13.032821100  | 3.105514220  | 5.953198940  |
| 6 | 16.801553860  | 4.820480020  | 10.854046830 |
| 6 | 17.469475260  | 5.100709070  | 9.598546240  |
| 7 | 17.409747320  | 5.089521600  | 12.052265180 |
| 7 | 18.728083030  | 5.642283170  | 9.574438180  |
| 6 | 19.275657190  | 5.897915180  | 10.752817530 |
| 6 | 18.619948280  | 5.623083270  | 11.985161410 |
| 6 | 1.471067320   | -1.626520250 | 18.005538200 |
| 6 | 0.132079900   | -2.190391720 | 18.005829860 |
| 7 | 2.109562440   | -1.356899260 | 16.828310950 |
| 7 | 3.411148790   | -0.884628800 | 14.448334850 |

|   |              |              |              |
|---|--------------|--------------|--------------|
| 7 | 2.131548010  | -1.501343370 | 11.996055560 |
| 6 | 3.403269350  | -1.023498030 | 12.012036090 |
| 6 | 4.060077550  | -0.709633980 | 13.272280590 |
| 7 | -1.758513410 | -3.053999130 | 14.448755020 |
| 6 | 4.101967370  | -0.803886280 | 10.806128710 |
| 6 | 5.376215090  | -0.199546300 | 13.248302730 |
| 7 | -0.507504410 | -2.458819350 | 16.828932380 |
| 7 | -0.422402770 | -2.572358580 | 11.996419760 |
| 6 | -1.654817150 | -3.143797950 | 12.012365840 |
| 6 | -2.338770260 | -3.392808970 | 13.272662770 |
| 1 | 5.889515070  | -0.032751560 | 14.200111130 |
| 1 | 3.633491000  | -1.111547220 | 9.865796340  |
| 6 | 0.158062550  | -2.244986760 | 15.684757100 |
| 6 | -0.501001680 | -2.557822940 | 14.417875360 |
| 6 | 1.529728330  | -1.746538580 | 13.179116280 |
| 6 | 0.174650850  | -2.315252910 | 13.179406460 |
| 6 | 2.176138730  | -1.433806900 | 14.417534260 |
| 6 | 1.491123050  | -1.684082590 | 15.684556730 |
| 1 | 19.120524230 | 5.846764390  | 12.933057700 |
| 1 | 20.280612450 | 6.332856960  | 10.752876940 |
| 1 | 3.115621010  | -0.939904890 | 19.242038420 |
| 6 | 2.099850600  | -1.339365010 | 19.226807690 |
| 6 | 1.454908900  | -1.591504970 | 20.451304160 |
| 6 | 0.119200220  | -2.154383290 | 20.451551750 |
| 6 | -0.512169160 | -2.439848450 | 19.227310740 |
| 1 | -1.507363640 | -2.888134000 | 19.242849670 |
| 7 | -0.535444310 | -2.417490860 | 21.626432150 |
| 7 | 2.100669290  | -1.306372870 | 21.625960790 |
| 6 | 1.429581110  | -1.564884490 | 22.737908440 |
| 6 | 0.118527310  | -2.117494810 | 22.738162970 |
| 1 | 1.929373130  | -1.341678240 | 23.686332450 |
| 1 | -0.389935550 | -2.319348900 | 23.686763750 |
| 1 | -4.101562560 | -4.227264550 | 14.200313310 |
| 6 | -3.625517470 | -3.973427860 | 13.248179030 |
| 6 | -4.272520110 | -4.318022730 | 12.049129820 |

|   |              |              |               |
|---|--------------|--------------|---------------|
| 6 | -3.584683260 | -4.067186410 | 10.780339410  |
| 6 | -2.301620540 | -3.486813280 | 10.806282750  |
| 1 | -1.753789910 | -3.367971820 | 9.866011040   |
| 7 | -4.187059160 | -4.342372980 | 9.590299180   |
| 1 | 10.168434440 | 1.634567410  | 2.406896300   |
| 6 | 11.137520240 | 2.143460880  | 2.399515380   |
| 6 | 11.782544140 | 2.364854350  | 1.167530700   |
| 6 | 13.122611840 | 2.956705210  | 1.167566420   |
| 6 | 13.718669780 | 3.279375440  | 2.398793670   |
| 1 | 14.748558950 | 3.649355350  | 2.409484120   |
| 7 | 13.765952880 | 3.232674140  | -0.000560740  |
| 7 | 11.145044490 | 2.074213130  | -0.000567210  |
| 1 | 9.752046010  | 1.557348240  | 11.792521470  |
| 6 | 9.214672450  | 1.399958850  | 10.851951930  |
| 6 | 7.944464020  | 0.797770230  | 10.883263190  |
| 6 | 7.281698740  | 0.487265770  | 9.614207830   |
| 6 | 7.935904020  | 0.807500180  | 8.409482450   |
| 1 | 7.474442440  | 0.513605640  | 7.461575350   |
| 7 | 6.034866900  | -0.060409760 | 9.590955540   |
| 7 | 7.328629490  | 0.552998690  | 12.072739730  |
| 6 | 6.076085490  | 0.018403530  | 12.049741510  |
| 6 | 5.415725200  | -0.296763080 | 10.780863510  |
| 6 | 13.071288170 | 3.055197320  | -3.634555180  |
| 7 | 13.670818350 | 3.400464090  | -4.798948780  |
| 7 | 14.909658720 | 3.988841550  | -7.186885960  |
| 7 | 13.601045780 | 3.441056290  | -9.646503930  |
| 6 | 14.861710680 | 3.967172960  | -9.634056830  |
| 6 | 15.531364640 | 4.247273930  | -8.375550340  |
| 6 | 11.740175210 | 2.466737300  | -3.634630230  |
| 7 | 9.803590540  | 1.718240130  | -7.200531310  |
| 6 | 15.511332310 | 4.261629330  | -10.842620290 |
| 6 | 16.817898700 | 4.807575830  | -8.387391170  |
| 7 | 11.080753300 | 2.250100600  | -4.802518100  |
| 7 | 11.083916400 | 2.321799220  | -9.655703330  |
| 6 | 9.869962840  | 1.721274680  | -9.643884400  |



|   |              |              |               |
|---|--------------|--------------|---------------|
| 6 | 9.210218040  | 1.412838060  | -8.383831170  |
| 1 | 17.343244610 | 4.998717200  | -7.449792510  |
| 1 | 15.031097600 | 4.031742130  | -11.795596650 |
| 6 | 11.725060760 | 2.523872980  | -5.956392120  |
| 6 | 11.047298300 | 2.241230450  | -7.229348230  |
| 6 | 13.030104650 | 3.138857530  | -8.471397300  |
| 6 | 11.693482870 | 2.547070960  | -8.469466360  |
| 6 | 13.696866850 | 3.417935950  | -7.218563600  |
| 6 | 13.032704950 | 3.106012770  | -5.954238520  |
| 6 | 16.801532800 | 4.822263850  | -10.854503250 |
| 6 | 17.469789410 | 5.101306430  | -9.598904070  |
| 7 | 17.409752070 | 5.091661780  | -12.052634860 |
| 7 | 18.728627670 | 5.642361710  | -9.574531730  |
| 6 | 19.276262800 | 5.898120460  | -10.752833230 |
| 6 | 18.620342590 | 5.624299540  | -11.985249070 |
| 6 | 1.471383760  | -1.627692650 | -18.006622860 |
| 6 | 0.132677890  | -2.192237430 | -18.006856180 |
| 7 | 2.109935810  | -1.357958940 | -16.829458480 |
| 7 | 3.411644220  | -0.885501670 | -14.449609450 |
| 7 | 2.132206420  | -1.502084780 | -11.997207190 |
| 6 | 3.403745630  | -1.023744300 | -12.013294710 |
| 6 | 4.060451450  | -0.709857930 | -13.273583120 |
| 7 | -1.757100060 | -3.056928550 | -14.449784360 |
| 6 | 4.102335820  | -0.803608220 | -10.807460280 |
| 6 | 5.376315830  | -0.199064730 | -13.249690750 |
| 7 | -0.506679480 | -2.461001040 | -16.829900280 |
| 7 | -0.421495070 | -2.574102580 | -11.997436450 |
| 6 | -1.653732450 | -3.145959140 | -12.013366020 |
| 6 | -2.337383110 | -3.395649960 | -13.273682530 |
| 1 | 5.889517620  | -0.032148680 | -14.201527990 |
| 1 | 3.633995850  | -1.111301290 | -9.867072000  |
| 6 | 0.158958400  | -2.246938650 | -15.685823590 |
| 6 | -0.499876130 | -2.560065130 | -14.418887550 |
| 6 | 1.530515290  | -1.747833100 | -13.180207290 |
| 6 | 0.175607900  | -2.317003830 | -13.180428620 |

|   |              |              |               |
|---|--------------|--------------|---------------|
| 6 | 2.176841430  | -1.435126300 | -14.418693440 |
| 6 | 1.491833160  | -1.685625660 | -15.685677090 |
| 1 | 19.121066350 | 5.848098290  | -12.933038430 |
| 1 | 20.281464680 | 6.332493610  | -10.752774230 |
| 1 | 3.115528450  | -0.940233200 | -19.243182630 |
| 6 | 2.099904620  | -1.340067390 | -19.227899570 |
| 6 | 1.454968410  | -1.592358830 | -20.452348660 |
| 6 | 0.119509330  | -2.155818000 | -20.452592780 |
| 6 | -0.511597120 | -2.441787430 | -19.228324010 |
| 1 | -1.506654960 | -2.890371470 | -19.243795560 |
| 7 | -0.535173210 | -2.418797800 | -21.627490760 |
| 7 | 2.100564550  | -1.306841200 | -21.626995840 |
| 6 | 1.429499570  | -1.565295220 | -22.738975700 |
| 6 | 0.118590540  | -2.118299680 | -22.739212500 |
| 1 | 1.929170750  | -1.341764230 | -23.687387790 |
| 1 | -0.389922520 | -2.320036070 | -23.687812810 |
| 1 | -4.099825550 | -4.230827480 | -14.201417150 |
| 6 | -3.623956130 | -3.976671290 | -13.249284650 |
| 6 | -4.271190950 | -4.320870930 | -12.050259730 |
| 6 | -3.583674890 | -4.069434410 | -10.781401720 |
| 6 | -2.300731570 | -3.488703690 | -10.807278630 |
| 1 | -1.753076820 | -3.369545940 | -9.866937380  |
| 7 | -5.530943110 | -4.837588610 | -12.073019380 |
| 1 | 10.168466450 | 1.634476320  | -2.407964620  |
| 6 | 11.137614370 | 2.143231330  | -2.400657930  |
| 6 | 11.782559840 | 2.364780190  | -1.168677380  |
| 6 | 13.122605550 | 2.956664550  | -1.168685360  |
| 6 | 13.718649940 | 3.279418150  | -2.399874840  |
| 1 | 14.748489710 | 3.649525630  | -2.410530020  |
| 1 | 9.751296810  | 1.560429890  | -11.793867150 |
| 6 | 9.213981980  | 1.402682850  | -10.853324970 |
| 6 | 7.943989490  | 0.800011110  | -10.884718580 |
| 6 | 7.281482960  | 0.488868330  | -9.615693030  |
| 6 | 7.935780100  | 0.808796280  | -8.410961510  |
| 1 | 7.474578820  | 0.514350840  | -7.463093540  |

|    |               |              |               |
|----|---------------|--------------|---------------|
| 7  | 6.034910610   | -0.059332650 | -9.592391110  |
| 7  | 7.328234080   | 0.555013920  | -12.074196230 |
| 6  | 6.076015620   | 0.019640200  | -12.051163770 |
| 6  | 5.415831170   | -0.295840350 | -10.782271730 |
| 19 | -11.561901190 | -4.843897390 | 11.120882340  |
| 19 | -14.658751420 | -6.142305870 | 5.287691530   |
| 19 | -8.592673890  | -3.594763300 | 5.371331200   |
| 19 | -3.105129530  | -1.296402560 | 16.402432060  |
| 19 | -0.004916440  | 0.002799330  | 10.762786580  |
| 19 | 3.112177700   | 1.310945740  | 16.400641710  |
| 19 | 11.567402910  | 4.842489450  | 11.111736470  |
| 19 | 8.582802050   | 3.592853380  | 5.372825010   |
| 19 | 14.663811530  | 6.138543970  | 5.287516220   |
| 19 | 14.664294440  | 6.138462400  | -5.288783860  |
| 19 | 8.583860440   | 3.592622570  | -5.371305320  |
| 19 | 11.567585520  | 4.845173690  | -11.112199860 |
| 19 | -0.004829380  | 0.000836460  | -10.763733590 |
| 19 | -3.104694050  | -1.298714780 | -16.401542070 |
| 19 | 3.112471730   | 1.309859180  | -16.401667220 |
| 19 | -8.588936300  | -3.595731720 | -5.372400150  |
| 19 | -14.658642280 | -6.144729600 | -5.286201080  |
| 19 | -11.561972060 | -4.843509690 | -11.120793500 |
| 19 | 14.231906100  | 5.956987780  | -0.000251000  |
| 19 | 8.971574300   | 3.755828200  | 0.002727040   |
| 19 | 7.218446200   | 3.027448560  | 13.306594520  |
| 19 | 4.433545970   | 1.859580040  | 8.450898990   |
| 19 | -7.147027490  | -2.991832390 | 13.355883560  |
| 19 | -4.435992190  | -1.854408380 | 8.450544350   |
| 19 | -14.238309860 | -5.965681430 | 0.001719980   |
| 19 | -8.992026120  | -3.763216070 | -0.001320370  |
| 19 | -4.434450870  | -1.854479330 | -8.455892760  |
| 19 | -7.147087680  | -2.993986440 | -13.354311580 |
| 19 | 4.433788540   | 1.858649610  | -8.448040970  |
| 19 | 7.219583370   | 3.028619200  | -13.310866630 |
